# Supplementary material for: Hematopoiesis under telomere attrition at the single-cell resolution
Source: PubMed Central journal article supplement (PMC8617077; doi:10.1038/s41467-021-27206-7), 2021-11-25
Supplement: 41467_2021_27206_MOESM1_ESM.pdf [file 41467_2021_27206_MOESM1_ESM.pdf]

**Supplementary information**

**Hematopoiesis under telomere attrition at the single-cell resolution**

**Thongon et al.**

### Supplementary Figure 1

Short telomeres induce megakaryocyte/myeloid lineage reprogramming of the HSC compartment.

**a**

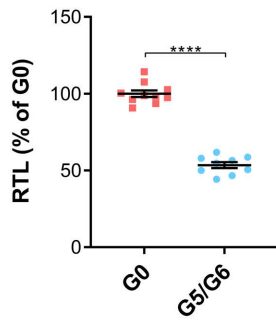

**b**

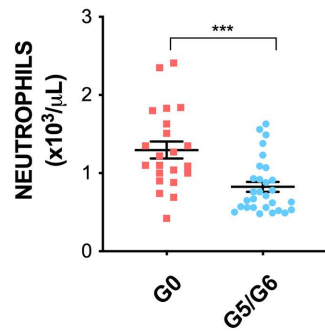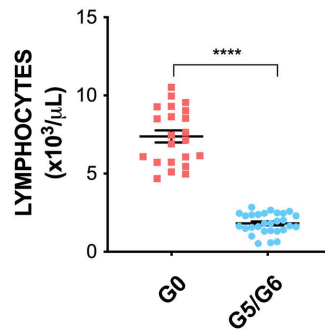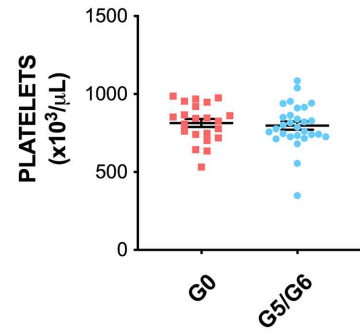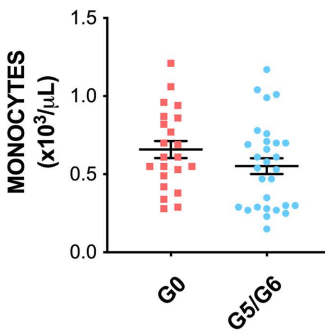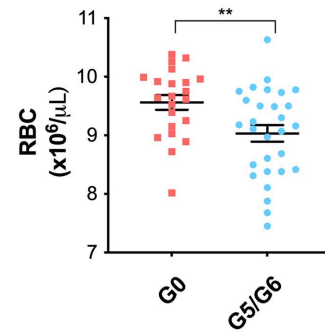

**c**

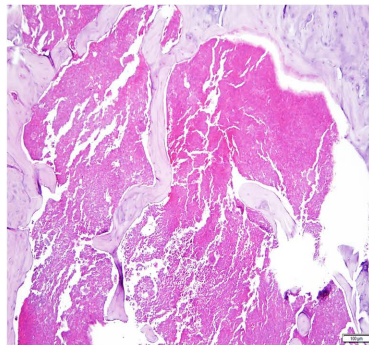

G0

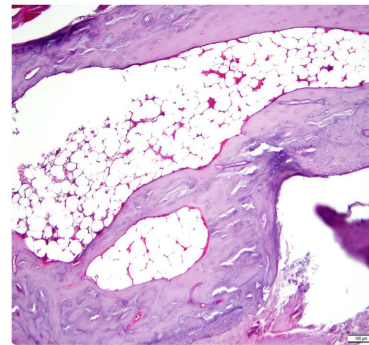

G5/G6

**Supplementary Figure 1. Short telomeres induce megakaryocyte/myeloid lineage reprogramming of the HSC compartment.**

**a,** Relative telomere length (RTL) in primary BM cells from G0 (n = 10) and G5/G6 (n = 9) mice as determined by combined flow cytometry and fluorescence *in situ* hybridization analysis. Data are expressed as percentages of the G0 control. Bars represent the means  $\pm$  S.E.M. Statistically significant differences were detected using a two-tailed Student's *t*-test. \*\*\*\* $P < 0.0001$ .

**b,** Blood cell counts of 2-month-old G0 (n = 22) and G5/G6 (n = 29) mice. Bars represent the means  $\pm$  S.E.M. RBC, red blood cells. Statistically significant differences were detected using a two-tailed Student's *t*-test. \*\* $P < 0.01$ , \*\*\*\* $P < 0.0001$ ; Monocytes:  $P = 0.16$ ; Platelets:  $P = 0.64$ .

**c,** Representative hematoxylin and eosin–stained sections of BM biopsies from one G0 and one G6 mouse. Scale bars represent 100  $\mu\text{m}$ .

Source data are provided as a Source Data file.

## Supplementary Figure 2

### Short telomeres induce megakaryocyte/myeloid lineage reprogramming of the HSC compartment.

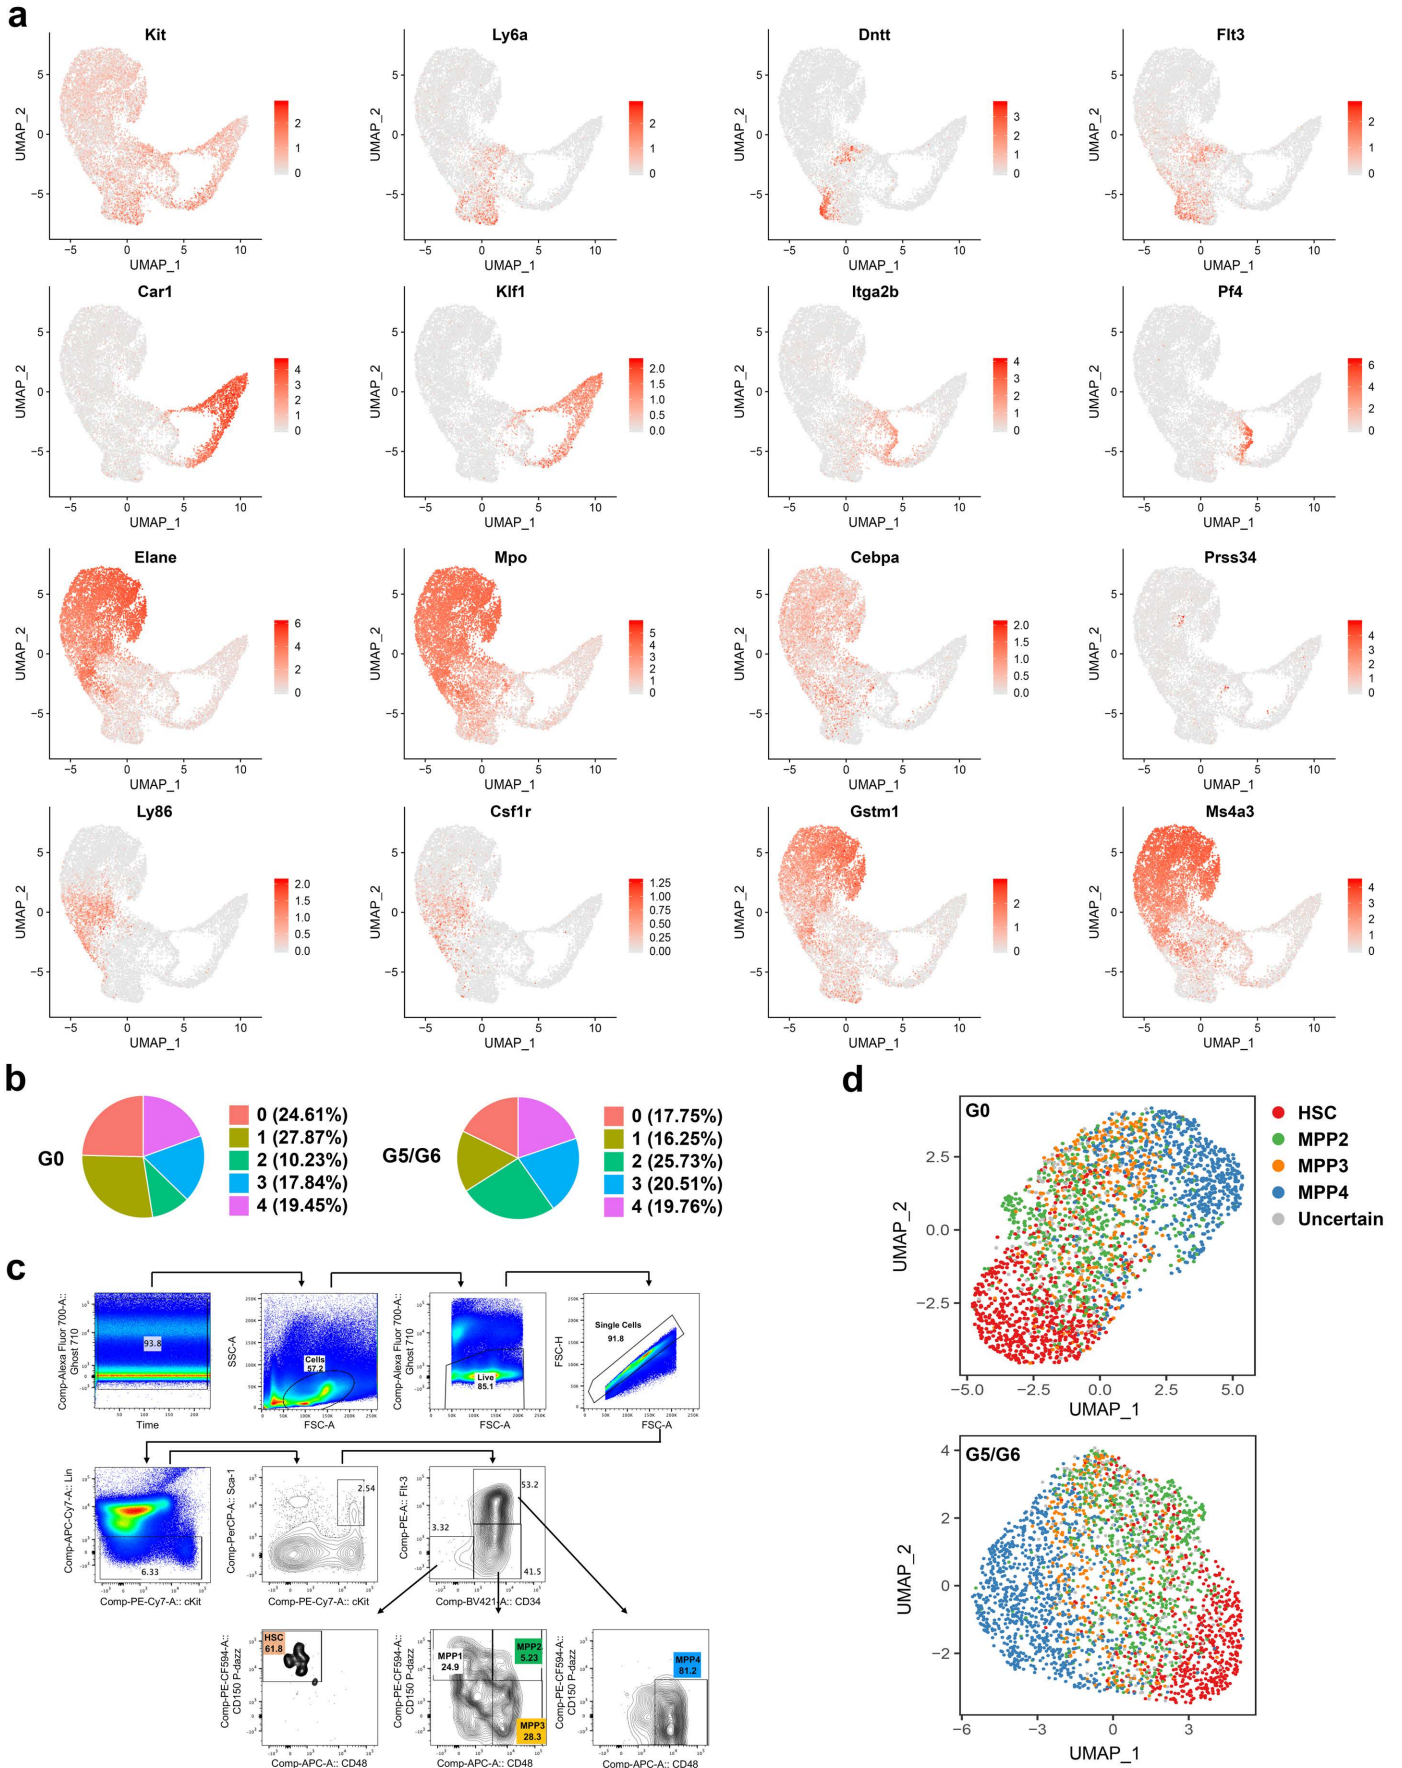

**Supplementary Figure 2. Short telomeres induce megakaryocyte/myeloid lineage reprogramming of the HSC compartment.**

**a,** UMAP of scRNA-seq data displaying single-cell expression levels of the lineage markers used to define the LK cell clusters in Fig. 1a. Normalized gene expression is indicated by red shading.

**b,** Distribution of G0 and G5/G6 LSK cells among the five scRNA-seq clusters shown in Fig. 1c and Fig. 1d, respectively. Data are shown as the percentages of cells belonging to each cluster.

**c,** Representative gating strategy used to analyze the mouse HSPC populations.

**d,** UMAP of scRNA-seq data displaying the G0 (top) and G5/G6 (bottom) LSK cells shown in Fig. 1c and Fig. 1d, respectively, color-coded by the identified HSPC populations.

### Supplementary Figure 3

### Short telomeres induce megakaryocyte/myeloid lineage reprogramming of the HSC compartment.

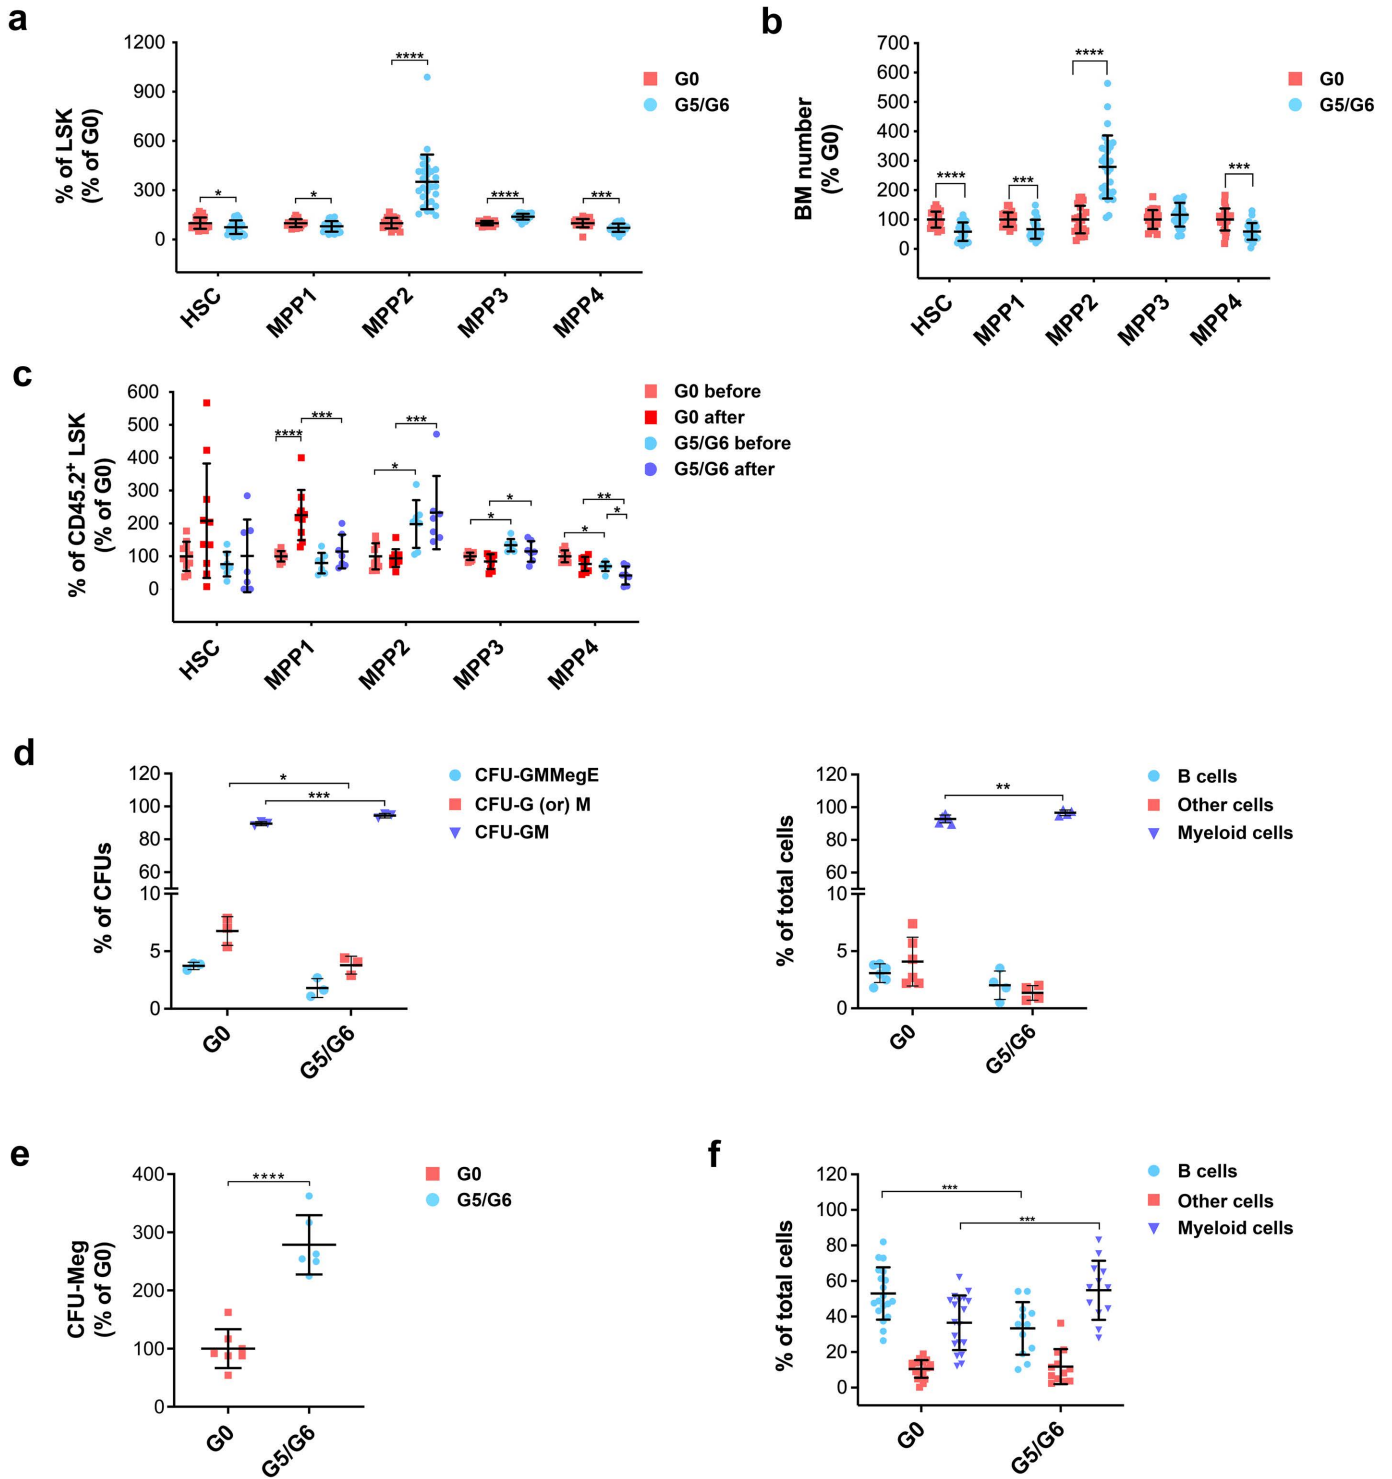

**Supplementary Figure 3. Short telomeres induce megakaryocyte/myeloid lineage reprogramming of the HSC compartment.**

**a,** Frequencies of HSPC populations in the LSK compartment of the G0 (n = 22) and G5/G6 (n = 29) mice whose blood cell counts are shown in Supplementary Fig. 1b. Data are expressed as percentages of the G0 control. Bars represent the means  $\pm$  S.D. Statistically significant differences were detected using a two-tailed Student's *t*-test. \**P* < 0.05, \*\*\*\**P* < 0.0001.

**b,** Numbers of HSCs and MPPs in the BM of the G0 (n = 22) and G5/G6 (n = 29) mice whose blood cell counts are shown in Supplementary Fig. 1b. Data are expressed as percentages of the G0 control. Bars represent means  $\pm$  S.D. Statistically significant differences were detected using a two-tailed Student's *t*-test. \*\*\**P* < 0.001, \*\*\*\**P* < 0.0001; MPP3: *P* = 0.11.

**c,** Frequencies of HSPC populations in the LSK compartment of G0 (n = 10) and G5/G6 (n = 7) mice before transplantation and in the CD45.2<sup>+</sup> LSK compartment of recipients transplanted with equal numbers of HSCs (n = 200) from the same G0 and G5/G6 mice. Data are expressed as percentages of the G0 control. Data from two independent transplantation experiments are shown. Bars represent the means  $\pm$  S.D. Statistically significant differences were detected using one-way ANOVA. \**P* < 0.05, \*\**P* < 0.01, \*\*\**P* < 0.001, \*\*\*\**P* < 0.0001; HSC, ANOVA: *P* = 0.15.

**d,** Left, methylcellulose clonogenic assays of single MPP3 cells isolated from G0 (n = 3) and G5/G6 (n = 3) mice (mean of two replicates per mouse). Equal numbers of cells (n = 300) were seeded to quantify the type of colony-forming unit (CFU). Bars represent the means  $\pm$  S.D. Statistically significant differences between the groups were detected using two-way ANOVA. \**P* < 0.05, \*\*\**P* < 0.001. GMMegE, granulocyte/macrophage/megakaryocyte/erythroid; G, granulocyte; M, macrophage; GM, granulocyte/macrophage. Right, clonogenic B-cell differentiation potential of MPP3 cells on OP9/IL-7 stromal cells. Equal numbers of single

MPP3 cells (n =1,000) from G0 (n =6) and G5/G6 (N = 4) mice were grown for 14 days and analyzed by flow cytometry for the production of CD19<sup>+</sup> B cells or Gr1<sup>+</sup>/CD11b<sup>+</sup> myeloid cells. Bars represent the means ± S.D. Statistically significant differences between the groups were detected using two-way ANOVA. \*\* $P < 0.01$ . B cells:  $P = 0.72$ , other cells:  $P = 0.06$ .

e, MegaCult collagen-based assays of single MPP2 cells isolated from G0 (n = 7) and 6 G5/G6 (n = 6) mice. Equal numbers of MPP2 cells (n =500) were seeded to quantify megakaryocyte CFUs (CFU-Meg). Bars represent the means ± S.D. Statistically significant differences were detected using a two-tailed Student's *t*-test. \*\*\*\* $P < 0.0001$ .

f, Clonogenic B-cell differentiation potential of MPP4 cells on OP9/IL-7 stromal cells. Equal numbers of single MPP4 cells (n =1,000) from G0 (n = 19) and G5/G6 (n = 12) mice were grown for 14 days and analyzed by flow cytometry for the production of CD19<sup>+</sup> B cells or Gr1<sup>+</sup>/CD11b<sup>+</sup> myeloid cells. Bars represent the means ± S.D. Statistically significant differences in the production of B and myeloid cells between the groups were detected using two-way ANOVA. \*\*\* $P < 0.001$ ; other cells:  $P = 0.99$ .

Source data are provided as a Source Data file.



## Supplementary Figure 4

HSCs with short telomeres are persistently activated, overexpress genes involved in IFN signaling, and are poised towards megakaryocytic differentiation.

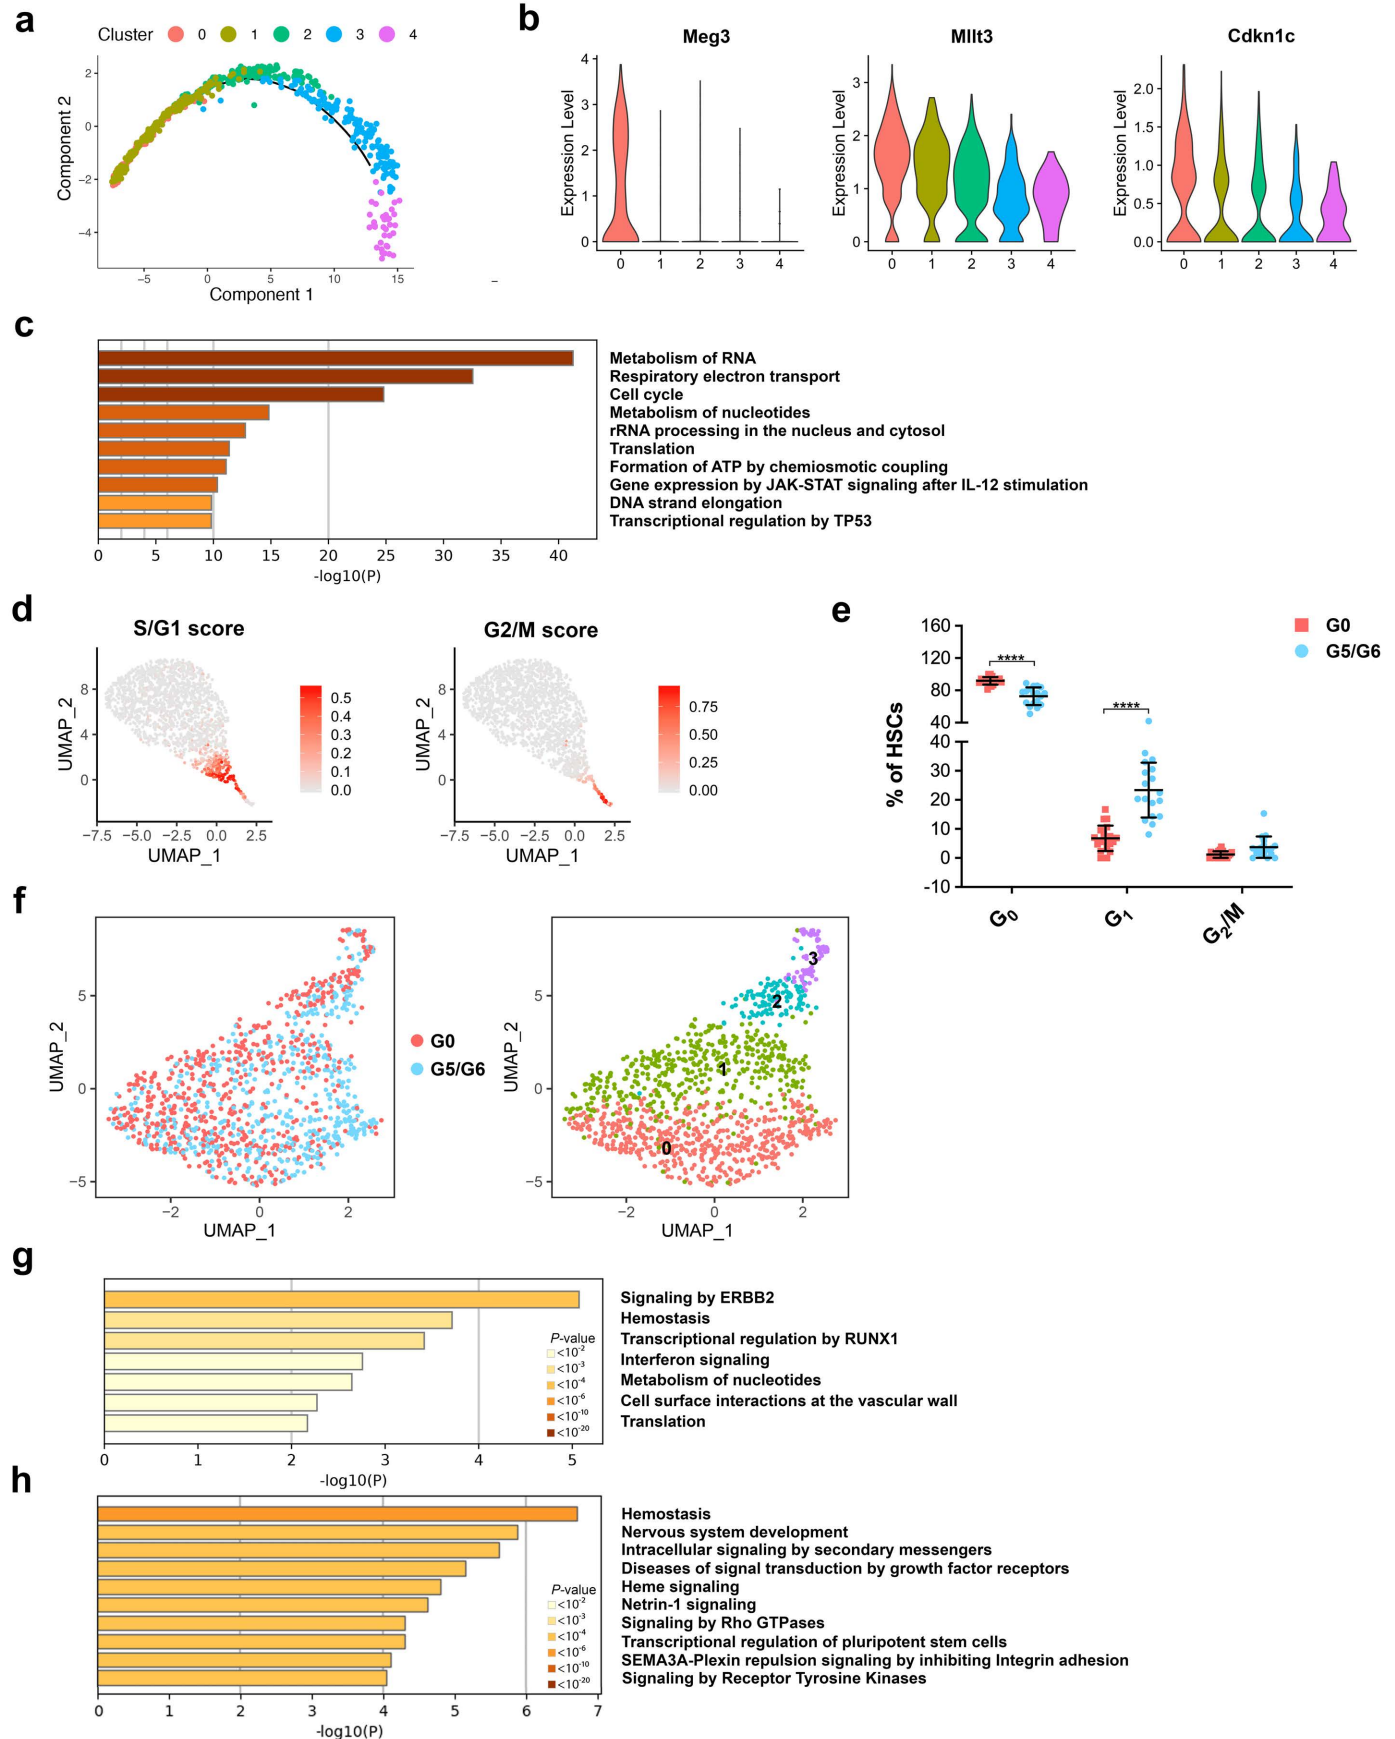

**Supplementary Figure 4. HSCs with short telomeres are persistently activated, overexpress genes involved in IFN signaling, and are poised towards megakaryocytic differentiation.**

**a**, Single-cell trajectory maps of the clusters shown in Fig. 2a. Each dot represents one cell.

Different colors represent different gene expression clusters.

**b**, Violin plots showing the distribution of the expression values of *Meg3*, *Mllt3*, and *Cdkn1c* across the HSC clusters shown in Fig. 2a.

**c**, Pathway enrichment analysis of genes whose expression was significantly decreased in cluster 0 shown in Fig. 2a and Supplementary Dataset 3 as compared with the other clusters (adjusted  $P \leq 0.05$ ). The top 10 Reactome gene sets are shown.

**d**, UMAP of the scRNA-seq data from Fig. 2a displaying the normalized average expression of cell cycle phase gene signatures.

**e**, Frequencies of G<sub>0</sub> (n = 20) and G<sub>5</sub>/G<sub>6</sub> (n = 18) HSCs in the G<sub>0</sub> (Ki67<sup>-</sup>DAPI<sup>-</sup>), G<sub>1</sub> (Ki67<sup>+</sup>DAPI<sup>-</sup>), and G<sub>2/M</sub> (Ki67<sup>+</sup>DAPI<sup>+</sup>) phases of the cell cycle. Data are expressed as percentages of the G<sub>0</sub> control. Bars represent means  $\pm$  S.D. Statistically significant differences were detected using two-way ANOVA. \*\*\*\* $P < 0.0001$ ; G<sub>2/M</sub>:  $P = 0.55$ .

**f**, UMAP of scRNA-seq data displaying 580 and 532 pooled single CD45.2<sup>+</sup> HSCs isolated from recipient mice competitively transplanted with equal numbers of G<sub>0</sub> or G<sub>5</sub>/G<sub>6</sub> HSCs, respectively (n  $\geq$  2 mice per group). Each dot represents one cell. Different colors represent sample (left) and cluster (right) identities.

**g**, Pathway enrichment analysis of significantly upregulated genes in G<sub>5</sub>/G<sub>6</sub> CD45.2<sup>+</sup> HSCs from clusters 0 and 1 shown in Supplementary Fig. 4f as compared to those of G<sub>0</sub> HSCs ( $P < 0.001$ ). Reactome gene sets are shown.

**h**, Pathway enrichment analysis of genes whose distal elements were enriched in accessible Irf2 binding sites in G5/G6 HSCs from cluster 0 shown in Fig. 2c and Supplementary Dataset 4 ( $P \leq 0.0001$ ). The top 10 Reactome gene sets are shown.

Source data are provided as a Source Data file.

**Supplementary Figure 5**  
**HSCs with short telomeres do not undergo apoptosis, autophagy, or senescence upon IFN signaling activation.**

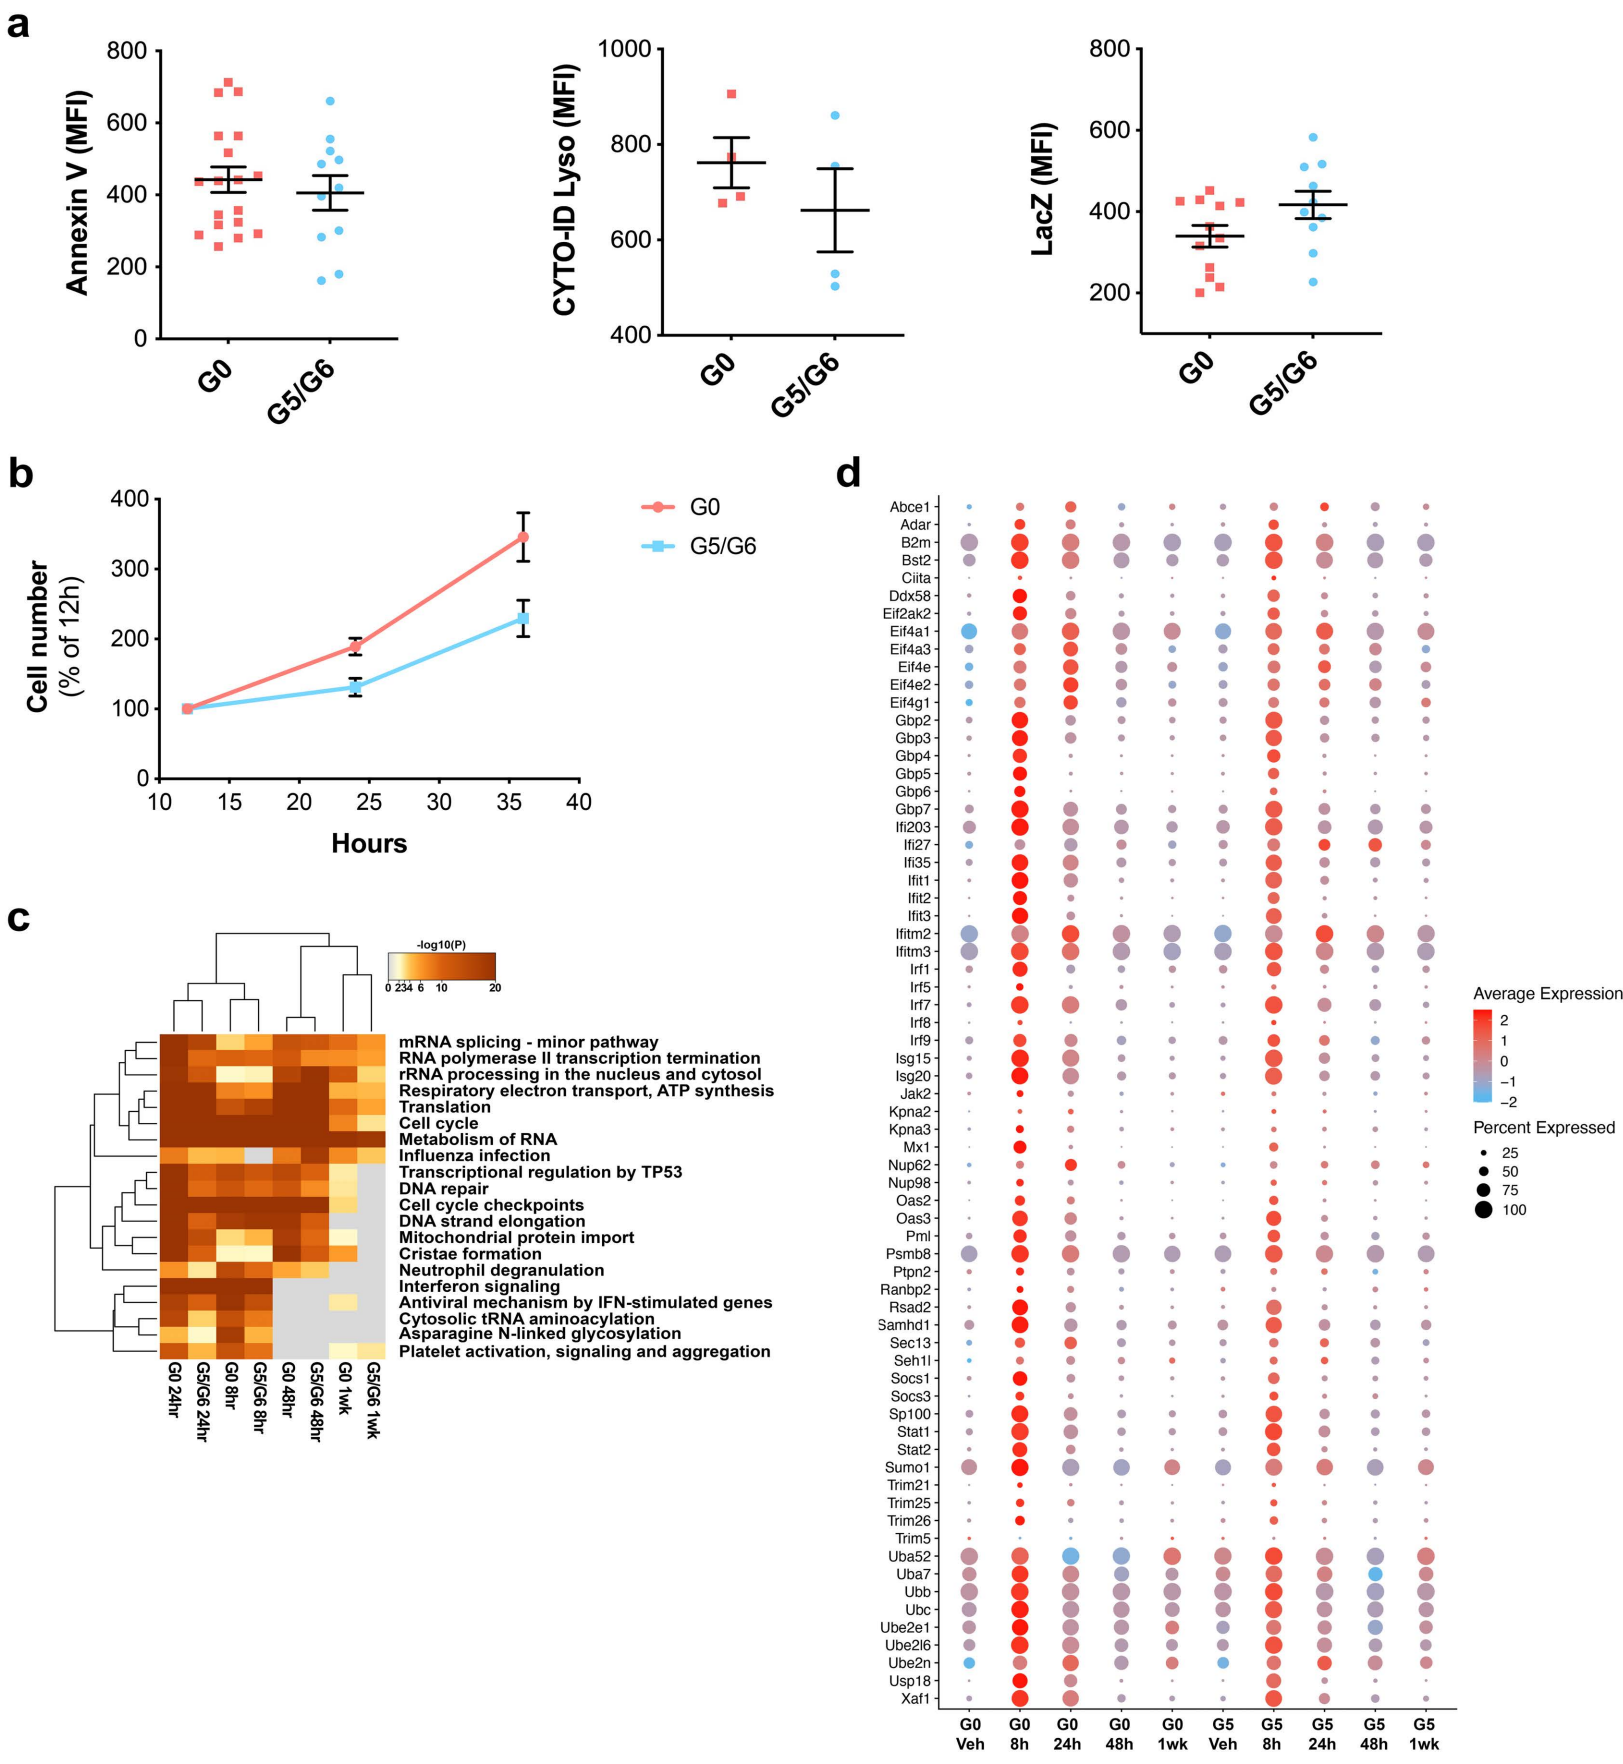

**Supplementary Figure 5. HSCs with short telomeres do not undergo apoptosis, autophagy, or senescence upon IFN signaling activation.**

**a,** Median fluorescence intensities (MFIs) of the apoptotic marker annexin V (left), autophagic marker Cyto-ID (middle), and senescence reporter LacZ (right) in HSCs from G0 (n = 18, 4, and 12, respectively) and G5/G6 (n = 11, 4, and 10, respectively) mice. Bars represent the means  $\pm$  S.E.M. No statistically significant differences were detected using a two-tailed Student's *t*-test:  $P = 0.53, 0.36$  and  $0.08$ , respectively).

**b,** Numbers of cells derived from pools of sorted G0 (n = 3 pools) and G5/G6 (n = 2 pools) HSCs induced to differentiate in vitro. Data are expressed as percentages of G0 or G5/G6 cells after 12 hours of culture.

**c,** Joint pathway enrichment analyses of genes that were significantly upregulated in G0 and G5/G6 HSCs at each time point (8, 24, and 48 hours and 1 week) following pI:pC injection as compared to those of HSCs isolated from mice treated with vehicle (adjusted  $P \leq 0.05$ ).

Reactome gene sets are shown.

**d,** Dot plot of genes belonging to the IFN signaling pathway that were significantly upregulated in G0 or G5/G6 HSCs 8 hours after pI:pC injection. G5 indicates G5/G6.

Source data are provided as a Source Data file.

Supplementary Figure 6  
HSCs with short telomeres do not undergo apoptosis, autophagy, or senescence upon IFN signaling activation.

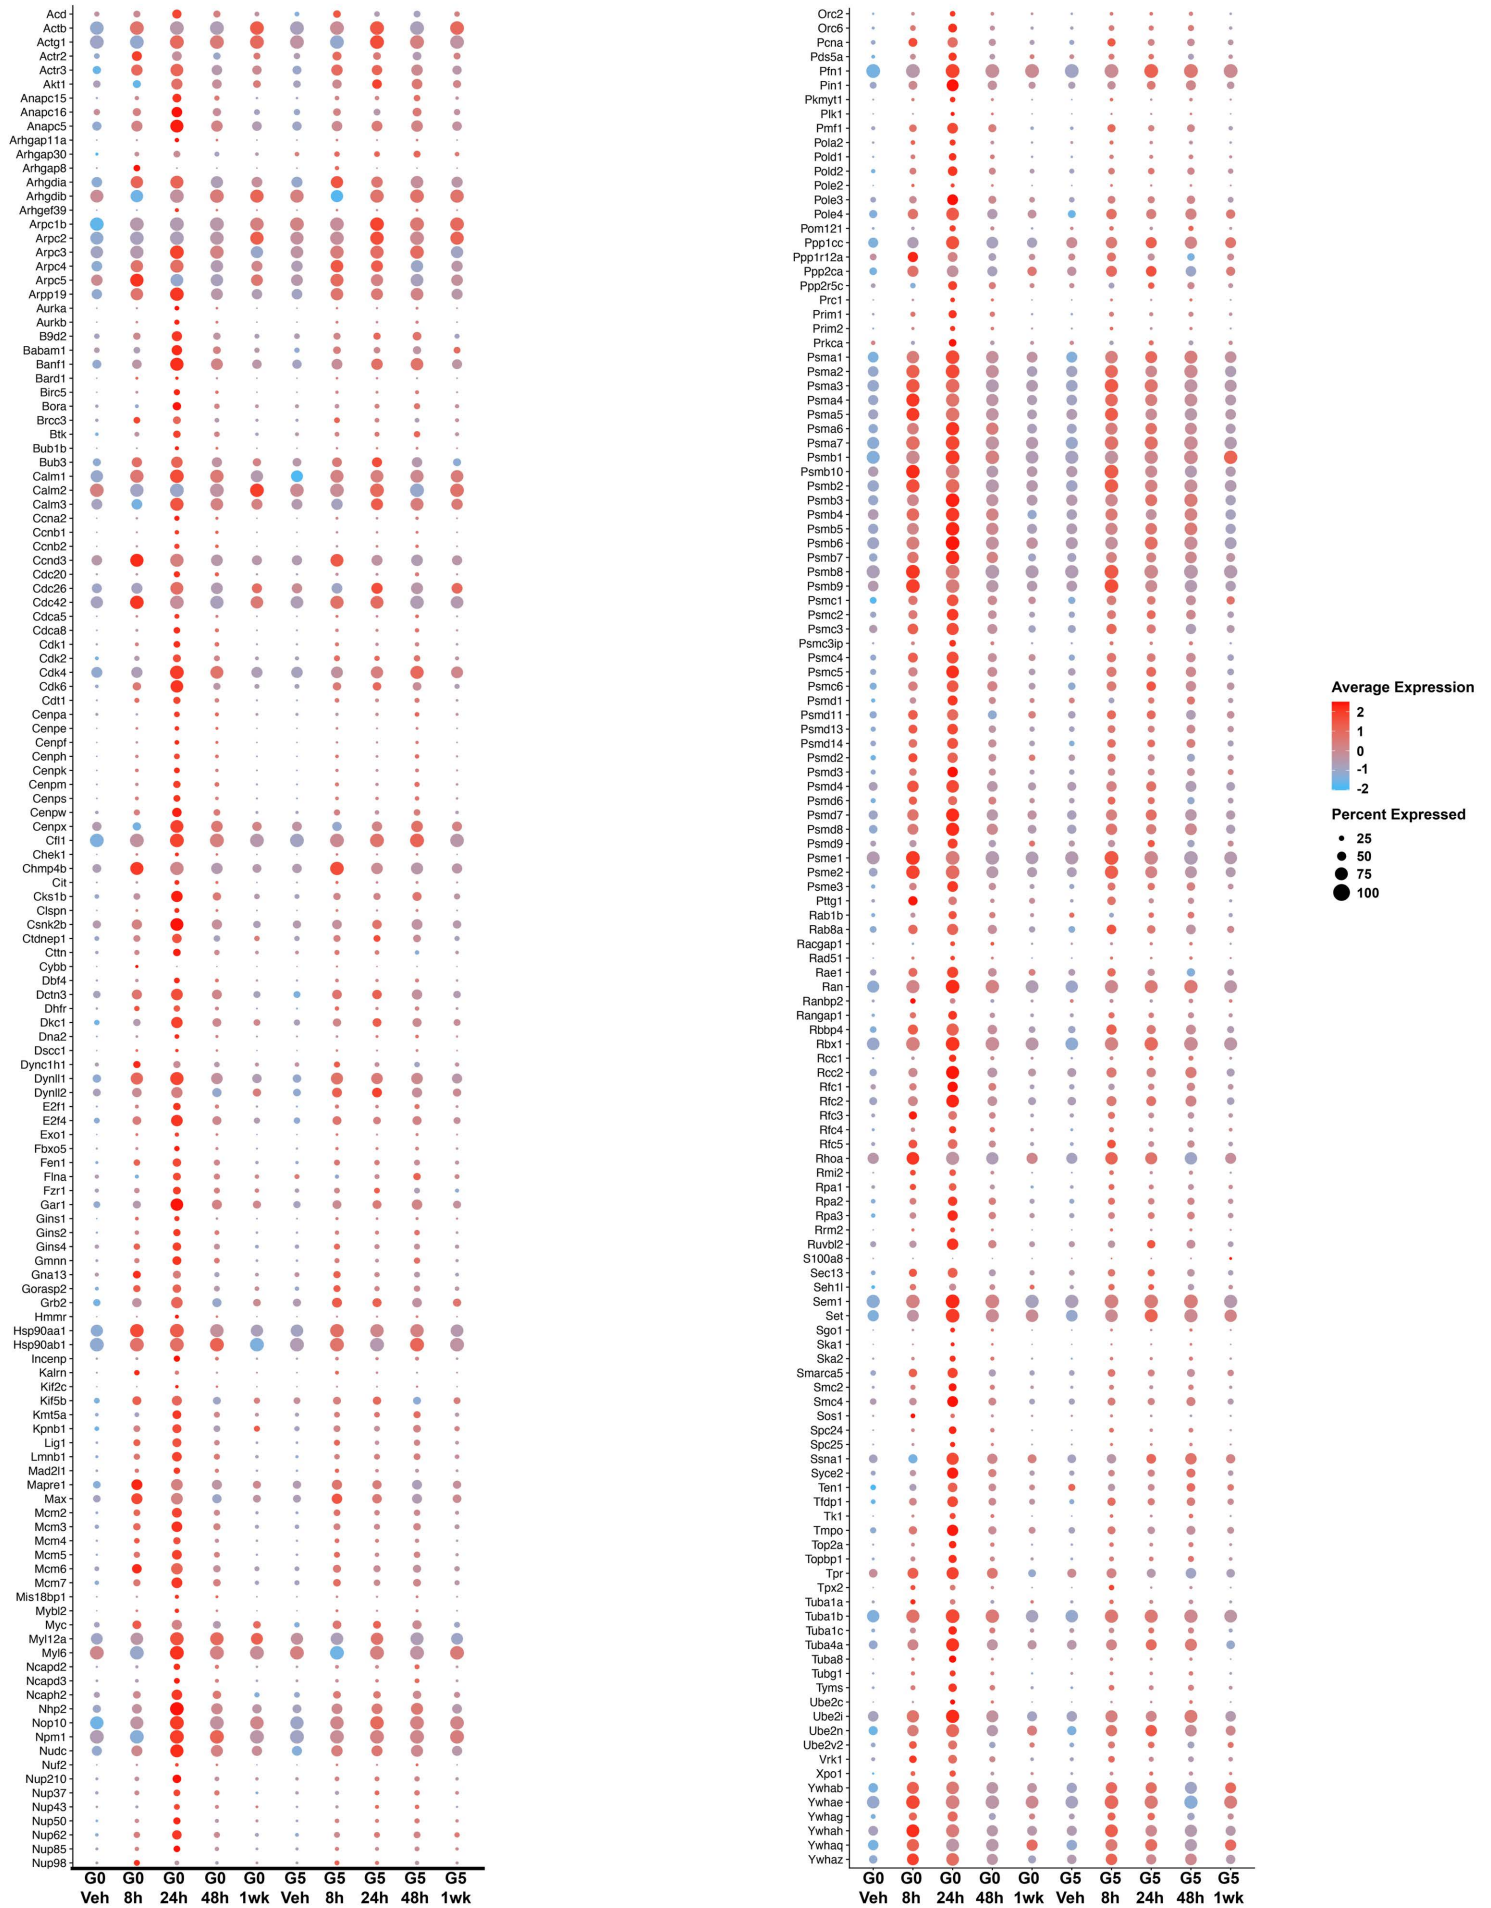

**Supplementary Figure 6. HSCs with short telomeres do not undergo apoptosis, autophagy, or senescence upon IFN signaling activation.**

Dot plot of genes belonging to the cell cycle pathway that were significantly upregulated in G0 or G5/G6 HSCs 8 hours after pI:pC injection. G5 indicates G5/G6.

**Supplemental Figure 7**  
**HSCs with short telomeres do not undergo apoptosis, autophagy, or senescence upon IFN signaling activation.**

**a**

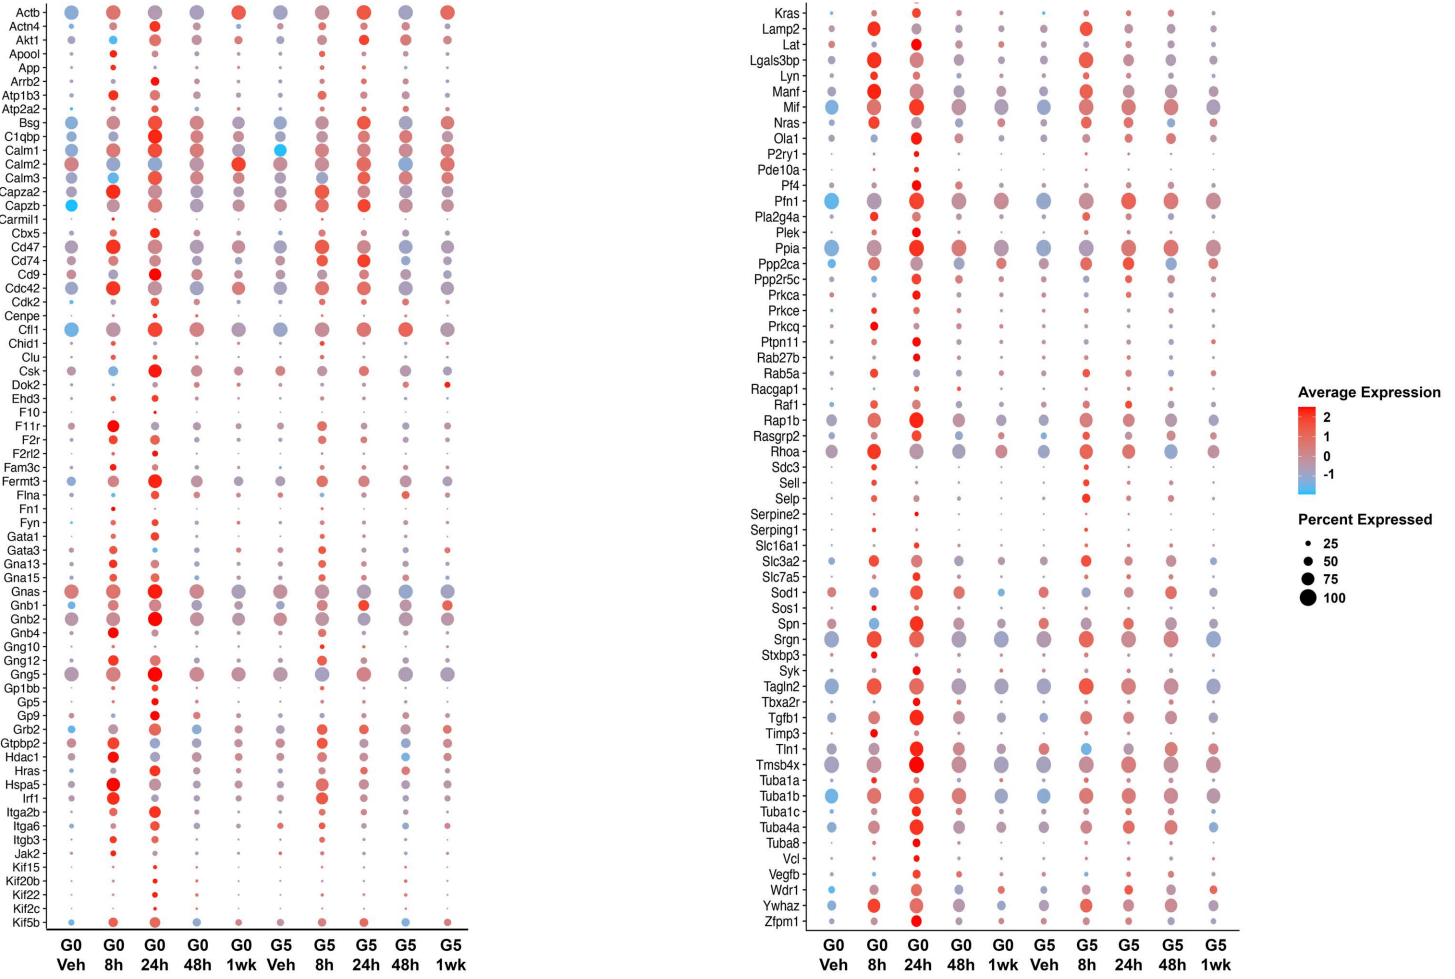

**b**

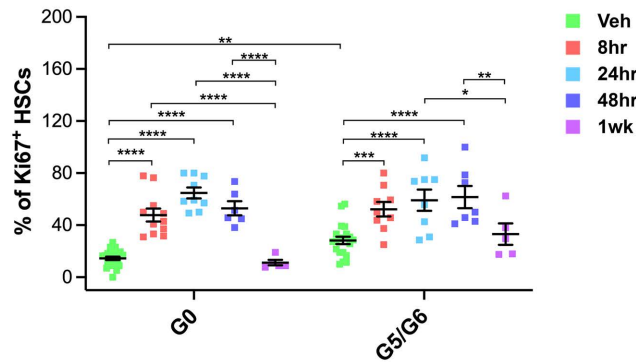

**c**

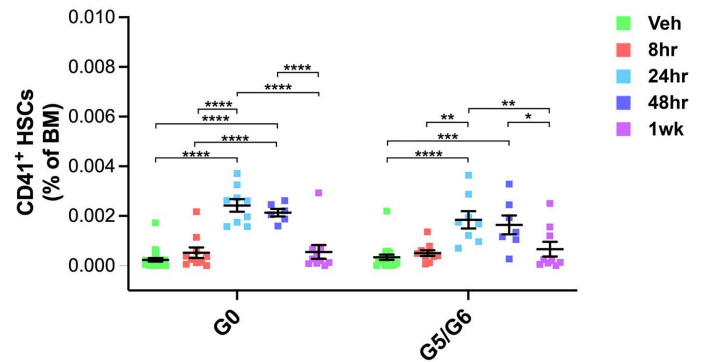

**d**

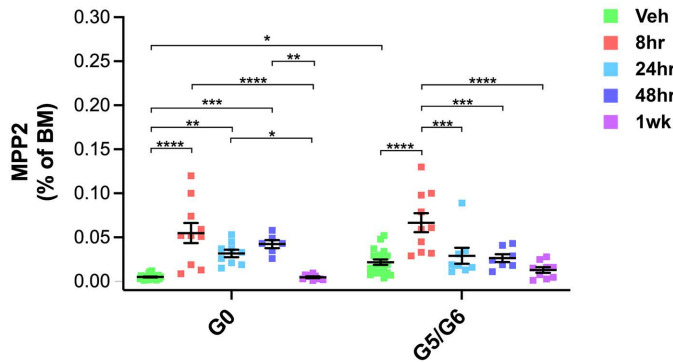



**Supplementary Figure 7. HSCs with short telomeres do not undergo apoptosis, autophagy, or senescence upon IFN signaling activation.**

**a**, Dot plot of genes belonging to the hemostasis pathway that were significantly upregulated in G0 or G5/G6 HSCs 8 hours after pI:pC injection. G5 indicates G5/G6.

**b**, Frequencies of G0 and G5/G6 HSCs that expressed Ki67 at each time point following pI:pC injection (n = 25 G0 Veh, 11 G0 8 h, 9 G0 24 h, 6 G0 48 h, 5 G0 1 wk, 20 G5/G6 Veh, 9 G5/G6 8 h, 8 G5/G6 24 h, 7 G5/G6 48 h, and 5 G5/G6 1 wk). Bars represent the means  $\pm$  S.E.M.

Statistically significant differences were detected using two-way ANOVA. \* $P < 0.05$ , \*\* $P < 0.01$ , \*\*\* $P < 0.001$ , \*\*\*\* $P < 0.0001$ . Veh, vehicle.

**c**, BM frequencies of G0 and G5/G6 CD41<sup>+</sup> HSCs at each time point following pI:pC injection (n = 25 G0 Veh, 10 G0 8 h, 9 G0 24 h, 6 G0 48 h, 10 G0 1 wk, 20 G5/G6 Veh, 10 G5/G6 8 h, 8 G5/G6 24 h, 7 G5/G6 48 h, and 9 G5/G6 1 wk). Bars represent the means  $\pm$  S.E.M. Statistically significant differences were detected using two-way ANOVA. \* $P < 0.05$ , \*\* $P < 0.01$ , \*\*\* $P < 0.001$ , \*\*\*\* $P < 0.0001$ . Veh, vehicle.

**d**, BM frequencies of G0 and G5/G6 MPP2 cells at each time point following pI:pC injection (n = 25 G0 Veh, 10 G0 8 h, 9 G0 24 h, 6 G0 48 h, 10 G0 1 wk, 20 G5/G6 Veh, 10 G5/G6 8 h, 8 G5/G6 24 h, 7 G5/G6 48 h, and 9 G5/G6 1 wk). Bars represent the means  $\pm$  S.E.M. Statistically significant differences were detected using two-way ANOVA. \* $P < 0.05$ , \*\* $P < 0.01$ , \*\*\* $P < 0.001$ , \*\*\*\* $P < 0.0001$ . Veh, vehicle.

Source data are provided as a Source Data file.

### Supplementary Figure 8

IFN signaling activation and HSC decline are the results of telomere damage and not responses to viral infection.

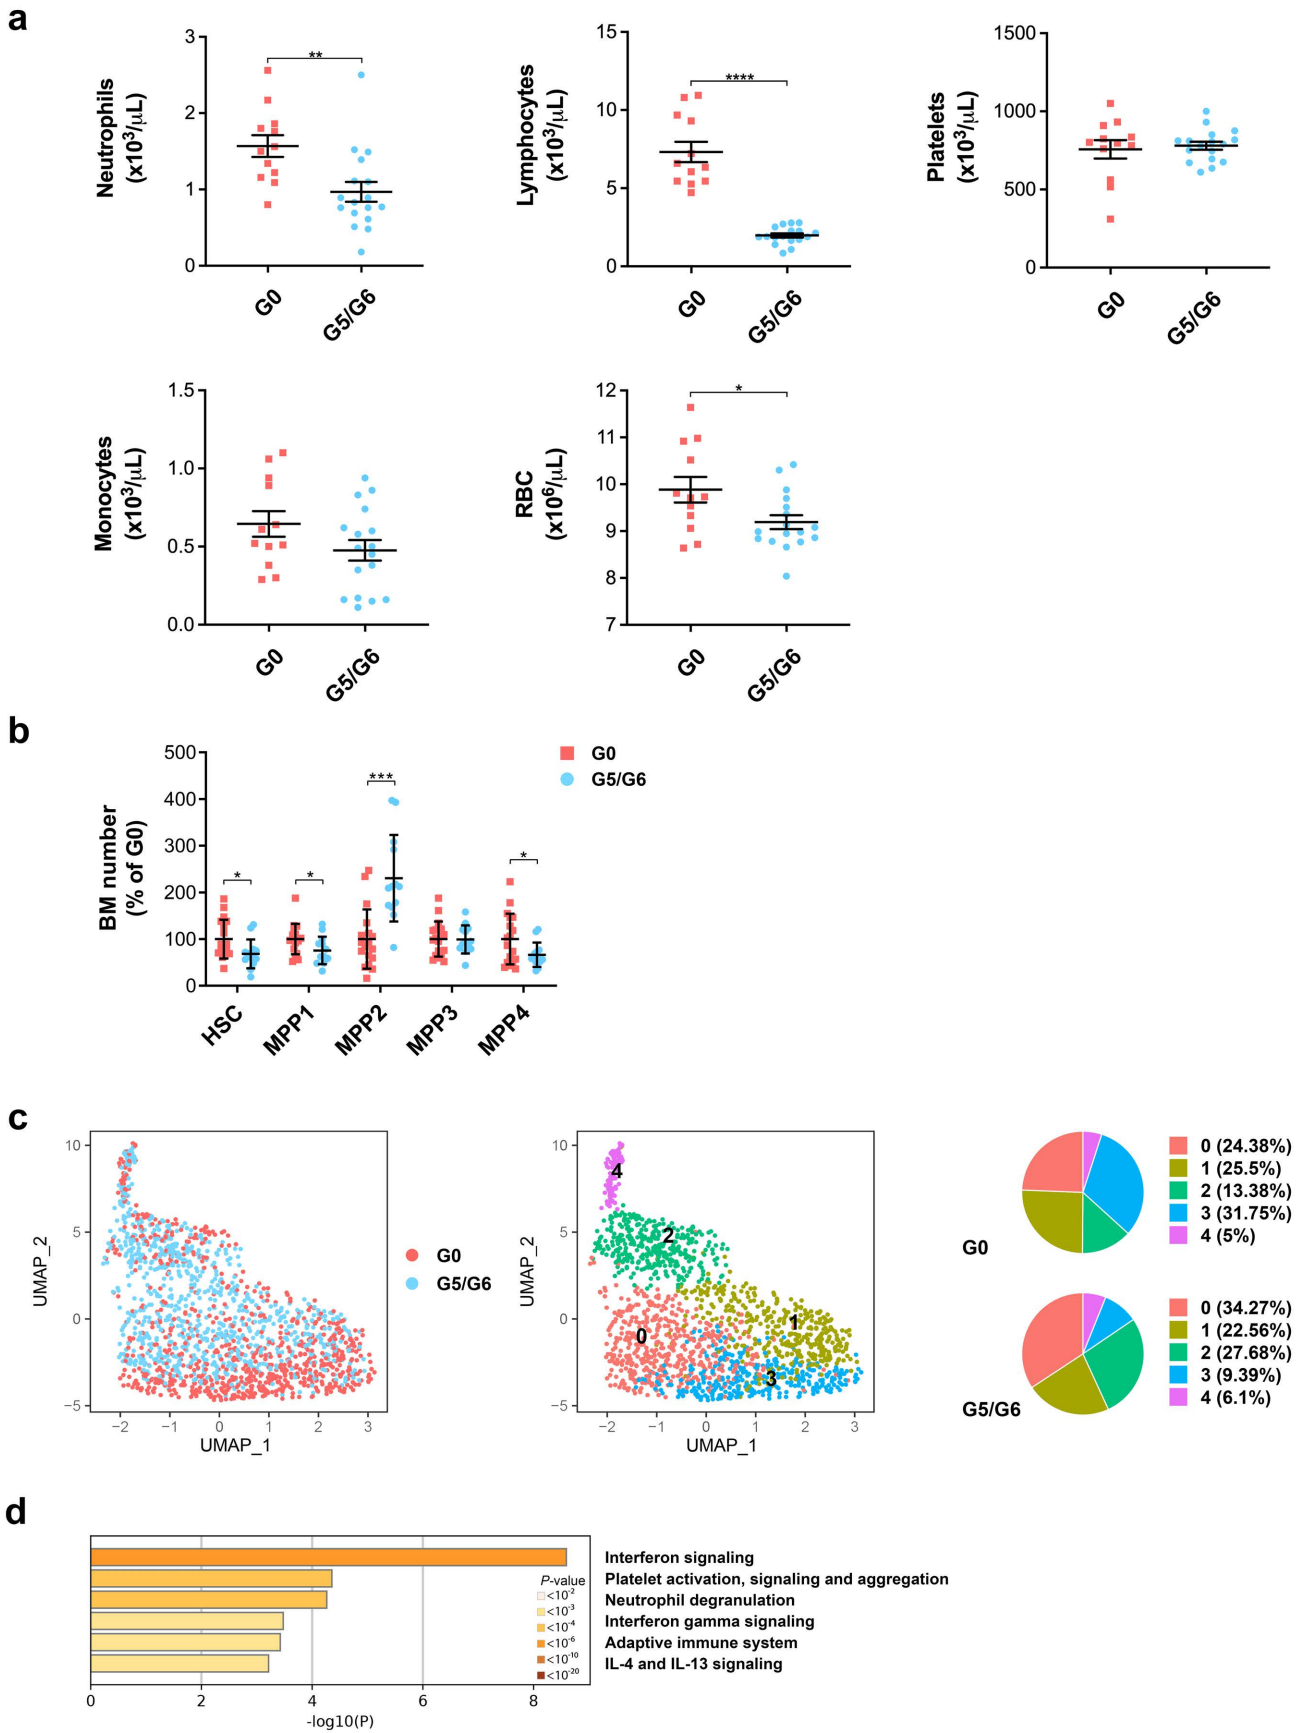

**Supplementary Figure 8. IFN signaling activation and HSC decline are the results of telomere damage and not responses to viral infection.**

**a**, Blood cell count evaluation of 2-month-old G0 (n = 12) and G5/G6 (n = 17) *R26-LSL* mice.

Bars represent the means  $\pm$  S.E.M. Statistically significant differences were detected using a two-tailed Student's *t*-test. \* $P < 0.05$ , \*\*\* $P < 0.001$ , \*\*\*\* $P < 0.0001$ ; Monocytes:  $P = 0.11$ ; Platelets:  $P = 0.68$ . RBC, red blood cells.

**b**, Numbers of HSCs and MPPs in the BM of G0 (n = 18) and G5/G6 (n = 13) *R26-LSL* mice.

Data are expressed as percentages of the G0 control. Bars represent means  $\pm$  S.D. Statistically significant differences were detected using a two-tailed Student's *t*-test. \* $P < 0.05$ , \*\*\* $P < 0.001$ ; MPP3:  $P = 0.94$ .

**c**, UMAP of scRNA-seq data displaying 800 and 820 pooled single HSCs isolated from G0 or G5/G6 *R26-LSL* mice, respectively (n  $\geq$  5 mice per group). Each dot represents one cell.

Different colors represent sample (left) and cluster (middle) identities. Right, distributions of HSCs from G0 and G5/G6 *R26-LSL* mice among the five scRNA-seq clusters, represented as the percentages of cells belonging to each cluster.

**d**, Pathway enrichment analysis of the marker genes of cluster 0 shown in Supplemental Fig. 8c and Supplementary Dataset 8 (adjusted  $P \leq 0.05$ ).

Source data are provided as a Source Data file.

## Supplementary Figure 9

IFN signaling activation and HSC decline are the results of telomere damage and not responses to viral infection.

**a**

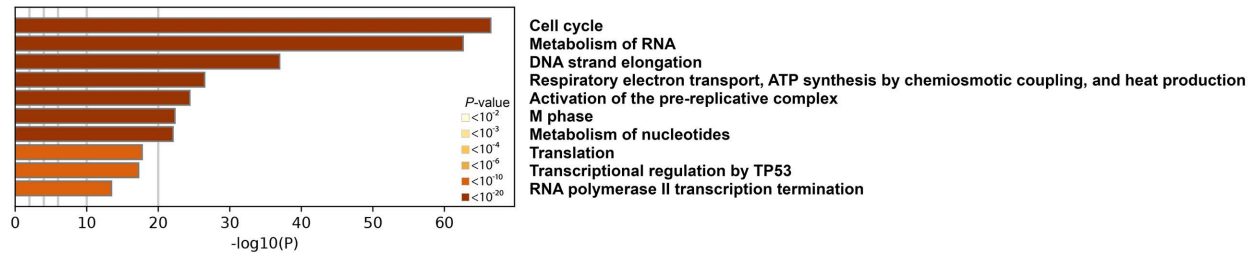

**b**

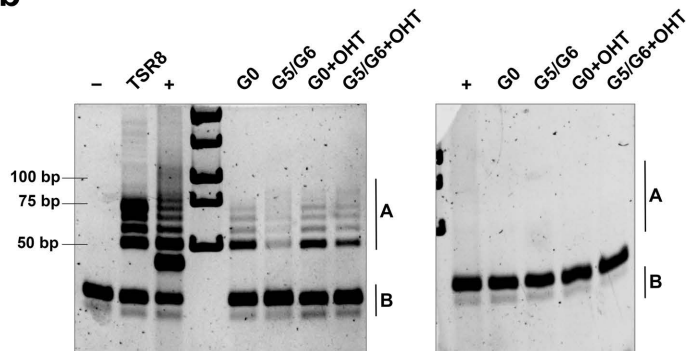

**c**

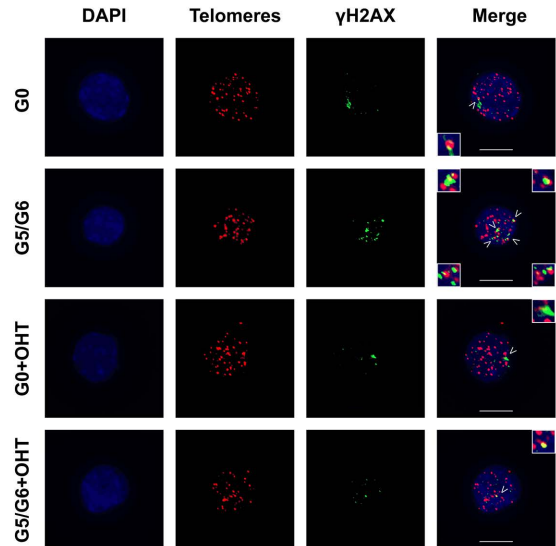

**d**

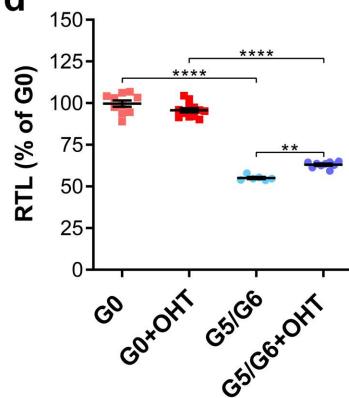

**e**

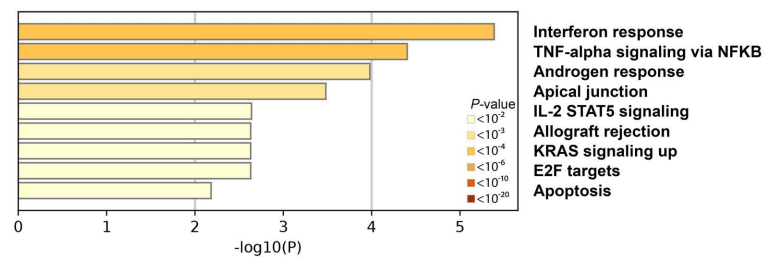

**f**

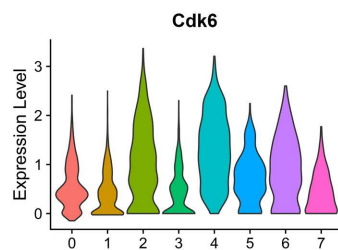

**g**

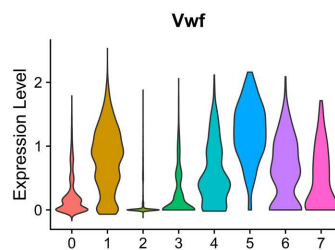

**Supplementary Figure 9. IFN signaling activation and HSC decline are the results of telomere damage and not responses to viral infection.**

**a**, Pathway enrichment analysis of the marker genes of cluster 2 shown in Supplemental Fig. 8c and Supplementary Dataset 8 (adjusted  $P \leq 0.05$ ).

**b**, Left, telomerase activity in protein lysates of pooled LSK cells isolated from *R26-LSL* mice with the indicated genotypes and treatments. Right, lysates were heat-inactivated. A, telomerase product; B, internal control; -, lysate from telomerase-negative cells; TSR8, quantification control template; +, lysate from telomerase-positive cells.

**c**, Representative anti-telomere and anti- $\gamma$ H2AX immunofluorescence in HSCs from *R26-LSL* mice with the indicated genotypes and treatments. Red indicates telomeres; green,  $\gamma$ H2AX; yellow, colocalization, blue; DAPI. Scale bars represent 10  $\mu$ m.

**d**, Relative telomere length (RTL) in primary BM cells from *R26-LSL* mice with the indicated genotypes and treatments as determined by combined flow cytometry and fluorescence *in situ* hybridization analysis. Data are expressed as percentages of the G0 control (n = 10 G0, 6 G5/G6, 12 G0+OHT, and 9 G5/G6+OHT mice from two independent experiments of telomerase reactivation). Bars represent the means  $\pm$  S.E.M. Statistically significant differences were detected using one-way ANOVA. \*\*\*\* $P < 0.0001$ ; G0 vs G0 + OHT:  $P = 0.15$ .

**e**, Pathway enrichment analysis of the marker genes of cluster 2 shown in Fig. 4b and Dataset 9 (adjusted  $P \leq 0.05$ ).

**f**, Violin plots showing the distribution of the expression values of *Cdk6* across the clusters shown in Fig. 4b.

**g**, Violin plots showing the distribution of the expression values of *Vwf* across the clusters shown in Fig. 4b.

Source data are provided as a Source Data file.

## Supplementary Figure 10

IFN signaling activation and HSC decline are the results of telomere damage and not responses to viral infection.

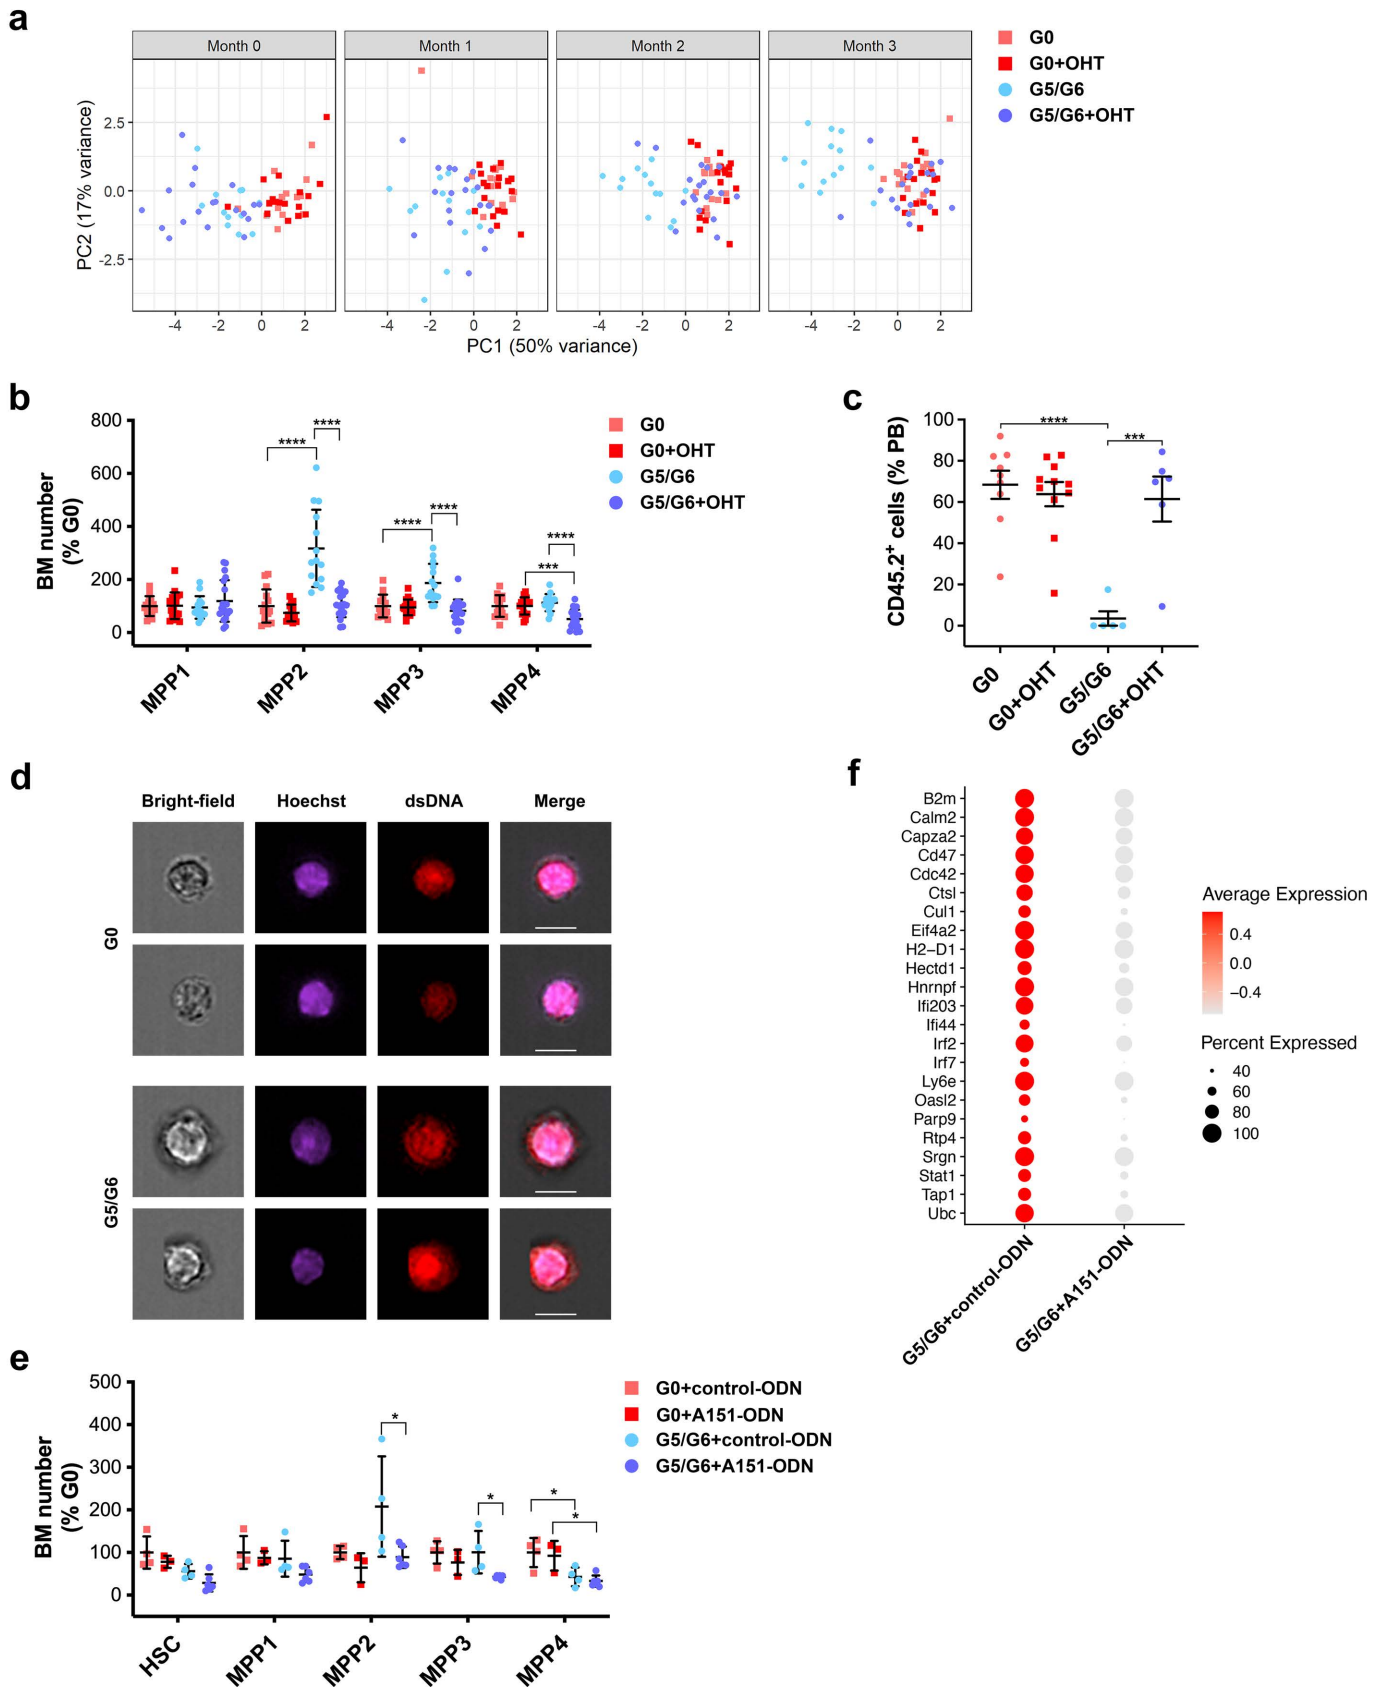

**Supplementary Figure 10. IFN signaling activation and HSC decline are the results of telomere damage and not responses to viral infection.**

**a**, Principal component analysis of the blood cell counts (frequencies of white blood cells, neutrophils, lymphocytes, platelets, monocytes, and red blood cells) of G0 and G5/G6 *R26-LSL* mice at the indicated time points after vehicle or OHT treatment.

**b**, Numbers of MPPs in the BM of vehicle- or OHT-treated G0 and G5/G6 *R26-LSL* mice (n = 15 G0, 14 G5/G6, 18 G0+OHT, and 19 G5/G6+OHT mice from four independent reactivation experiments). Data are expressed as percentages of the vehicle-treated G0 mice. Bars represent means  $\pm$  S.D. Statistically significant differences were detected using one-way ANOVA. \*\*\* $P < 0.001$ , \*\*\*\* $P < 0.0001$ ; MPP1, ANOVA:  $P = 0.60$ .

**c**, Frequencies of CD45.2<sup>+</sup> cells in the PB of CD45.1 recipients that were competitively transplanted with equal numbers of HSCs (n = 200) isolated from *R26-LSL* mice with the indicated genotypes and treatments (n = 9 G0, 5 G5/G6, 11 G0+OHT, and 6 G5/G6+OHT from two independent experiments of telomerase reactivation). Bars represent the means  $\pm$  S.E.M. Statistically significant differences were detected using one-way ANOVA. \*\*\* $P < 0.001$ , \*\*\*\* $P < 0.0001$ ; G0 vs G0 + OHT:  $P = 0.97$ .

**d**, Representative anti-double-stranded DNA (dsDNA) immunofluorescence in G0 and G5/G6 HSCs. Bright field microscopy enhances the contrast between the nucleus and cytoplasm. Blue indicates Hoechst staining (nucleus); red, dsDNA. Scale bars represent 10  $\mu$ m.

**e**, Numbers of HSCs and MPPs in the BM of G0 and G5/G6 mice treated with a control oligodeoxynucleotide (control-ODN) (n = 4 mice per group) or the oligodeoxynucleotide A151 (A151-ODN) (n = 3 and 6 mice, respectively). Data are expressed as percentages of the G0 control. Bars represent means  $\pm$  S.D. Statistically significant differences were detected using

one-way ANOVA.  $*P < 0.05$ ; HSC: G5/G6 vs G5/G6 + A151 = 0.48; MPP1, ANOVA:  $P = 0.08$ .

**f**, Dot plot of genes belonging to the IFN response pathway that were significantly downregulated in A151-ODN-treated G5/G6 HSCs from cluster 2 shown in Fig. 4e, as compared to those of control-ODN-treated G5/G6 HSCs.

Source data are provided as a Source Data file.



## Supplementary Figure 11

The functional link among telomere shortening, IFN signaling activation, and HSC differentiation towards the megakaryocyte lineage is conserved in humans.

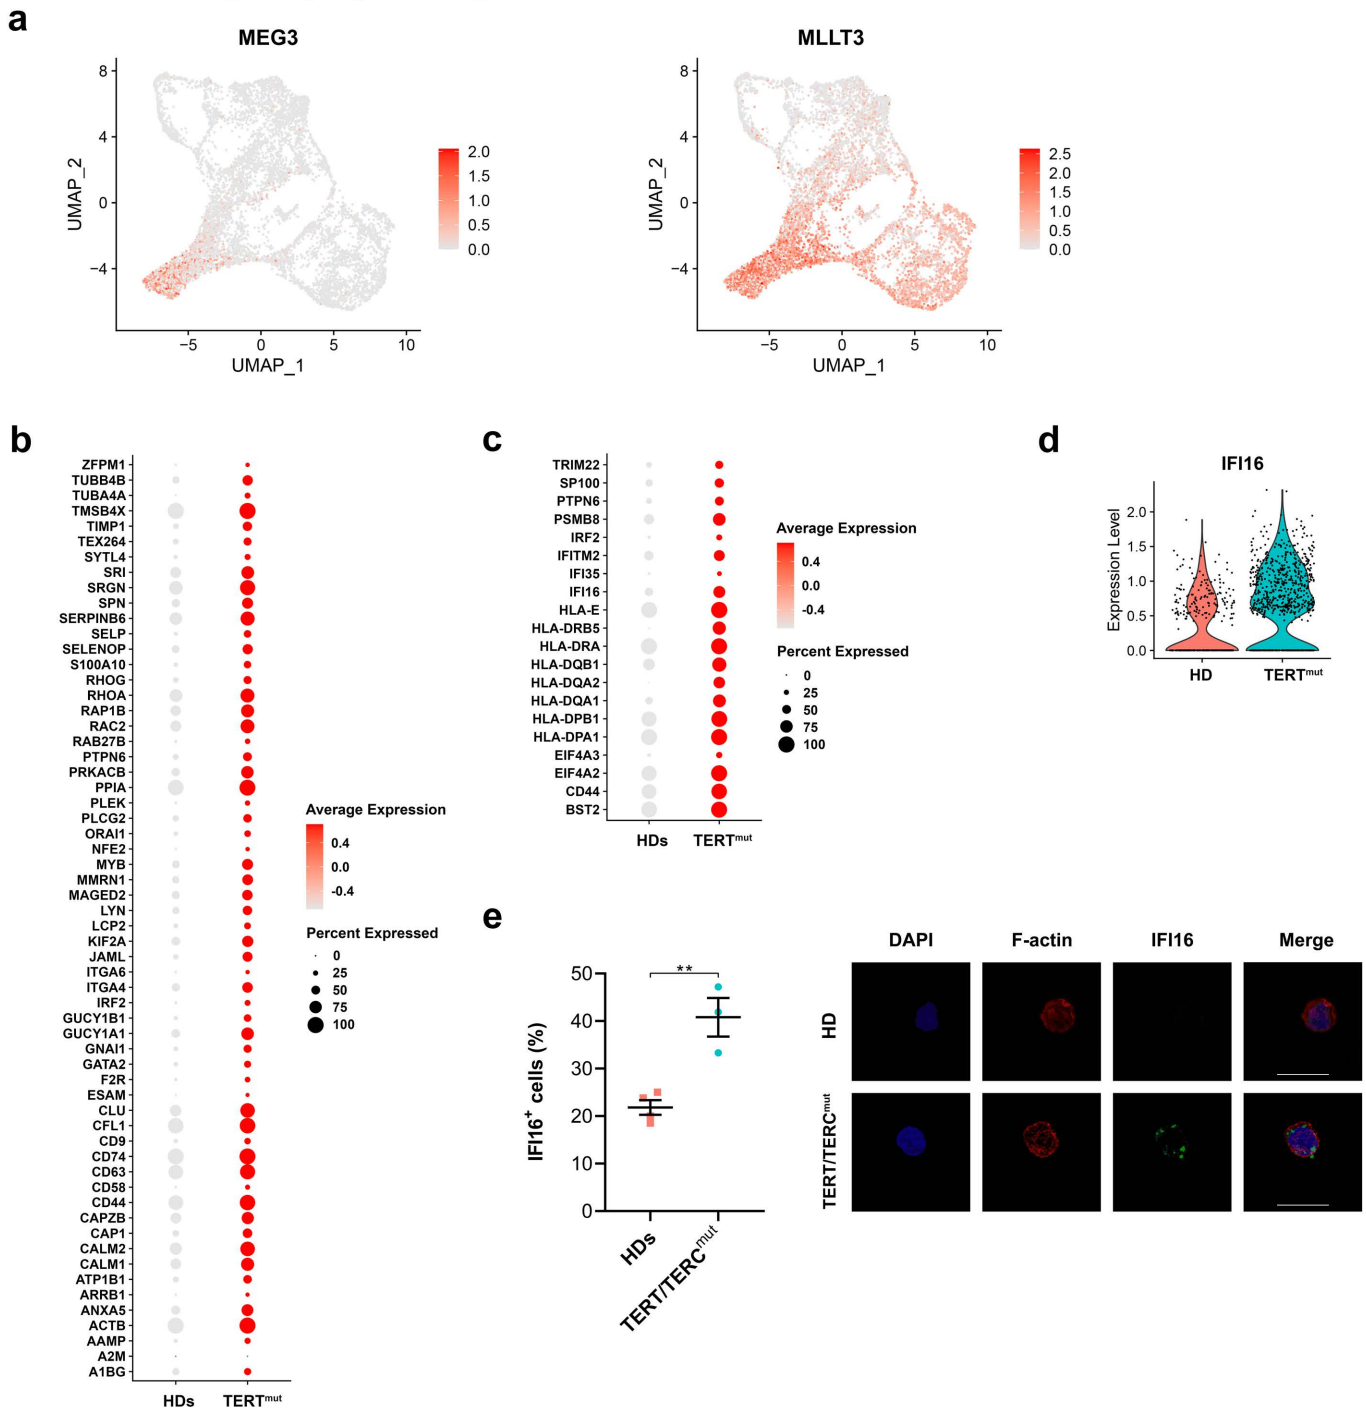

**Supplementary Figure 11. The functional link among telomere shortening, IFN signaling activation, and HSC differentiation towards the megakaryocyte lineage is conserved in humans.**

**a,** UMAP showing the distribution of the expression values of *MEG3* and *MLLT3* across the clusters shown in Fig. 5a. Normalized gene expression is indicated by red shading.

**b,** Dot plot of genes belonging to the hemostasis pathway that were significantly upregulated in the *TERT*-mutant (*TERT*<sup>mut</sup>) cells from cluster 1 shown in Fig. 5a as compared to cells from healthy donors (HDs).

**c,** Dot plot of genes belonging to the IFN response pathway that were significantly upregulated in *TERT*<sup>mut</sup> cells from cluster 1 shown in Fig. 5a as compared to cells from HDs.

**d,** Violin plots showing the expression of *IFI16* in HDs and *TERT*<sup>mut</sup> cells from cluster 1 shown in Fig. 5a.

**e,** Left, frequency of Lin<sup>-</sup>CD34<sup>+</sup> cells that expressed IFI16. Each dot represents one sample. Bars represent means ± S.E.M. (n = 4 HD and n = 3 *TERT/TERC*<sup>mut</sup> samples). Statistically significant differences were detected using a two-tailed Student's *t*-test. \*\**P* < 0.01. Right, representative anti-F-actin and anti-IFI16 immunofluorescence in Lin<sup>-</sup>CD34<sup>+</sup> cells from HDs or patients with telomerase complex mutations (*TERT/TERC*<sup>mut</sup>). Red indicates F-actin; green, IFI16; blue, DAPI. Scale bars represent 10 μm.

Source data are provided as a Source Data file.

## Supplementary Figure 12

The functional link among telomere shortening, IFN signaling activation, and HSC differentiation towards the megakaryocyte lineage is conserved in humans.

**a**

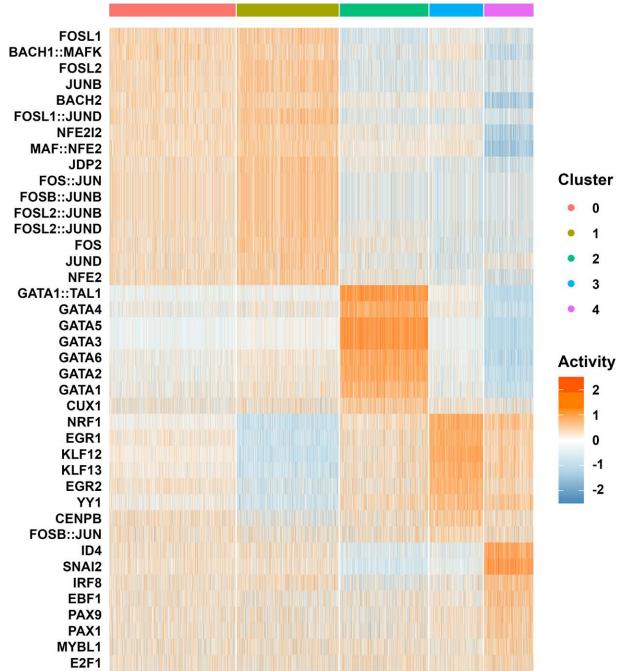

**b**

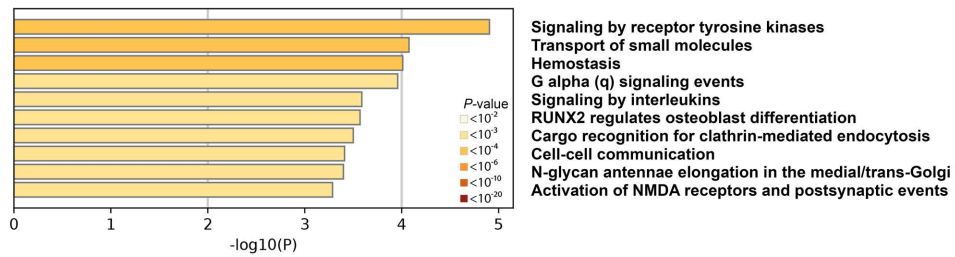

**c**

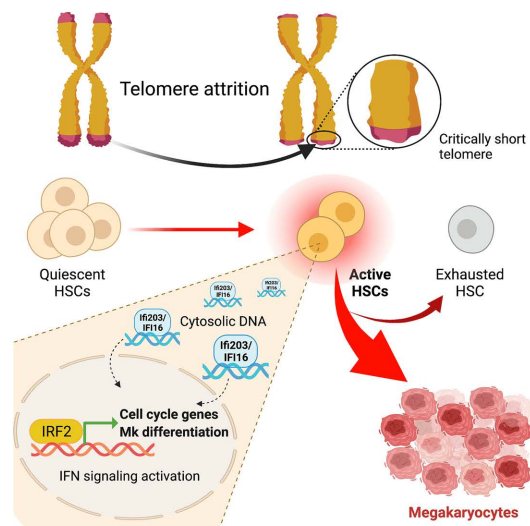

**Supplementary Figure 12. The functional link among telomere shortening, IFN signaling activation, and HSC differentiation towards the megakaryocyte lineage is conserved in humans.**

**a,** Heatmap of the levels of the top TFs whose binding sites were differentially enriched in open chromatin regions among cells in the five scATAC-seq clusters displayed in Fig. 5c.

**b,** Pathway enrichment analysis of genes whose distal elements had significantly upregulated open chromatin peaks in *TERT*<sup>mut</sup> cells from cluster 3 shown in Fig. 5c and Supplementary Dataset 15 as compared to those of HDs ( $P < 10^{-5}$ ). The top 10 Reactome gene sets are shown.

**c,** Proposed working model of telomere shortening-induced HSC exhaustion. Telomere attrition maintains HSCs in a state of persistent activation and differentiation towards the megakaryocytic lineage through the upregulation of the Ifi202/IFI16-mediated IFN signaling response. Persistent telomere attrition leads to HSCs' depletion. Mk, megakaryocytic.

Source data are provided as a Source Data file.

**Supplementary Table 1. Patients' characteristics.**

| Sample | Germline mutation        | Telomere length | BM failure | Age | Sex |
|--------|--------------------------|-----------------|------------|-----|-----|
| NIH1   | <i>TERT</i> c.570-586dup | <1%             | no         | 58  | M   |
| UPN16  | <i>TERT</i> c.2110C>T    | <1%             | no         | 49  | F   |
| NIH5   | <i>TERT</i> c.1892G>A    | <1%             | yes        | 20  | M   |
| NIH6   | <i>TERC</i> minus 58 C>G | <1%             | yes        | 42  | F   |

**Supplementary Table 2. Patients' peripheral blood counts.**

| Sample | WBC  | Neutrophils | RBC  | Lymphocytes | Platelets |
|--------|------|-------------|------|-------------|-----------|
| NIH1   | 5.49 | 3.54        | 5.14 | 1.32        | 171       |
| UPN16  | 11   | 8.47        | 4.17 | 1.6         | 243       |
| NIH5   | 3.76 | 2.13        | 3.83 | 1.07        | 23        |
| NIH6   | 4.29 | 2.51        | 3.19 | 0.94        | 54        |

**Supplementary Table 3. Cell surface marker expression panel used for the identification, quantification and purification of mouse HSPCs by flow cytometry.**

| Population       | Gating strategy                                                                                                                            |
|------------------|--------------------------------------------------------------------------------------------------------------------------------------------|
| Live cells       | Single cells/Ghost Dye Red 710 negative                                                                                                    |
| Lineage negative | Lineage antibody cocktail-negative                                                                                                         |
| LK               | Live/Lin <sup>-</sup> /c-Kit <sup>+</sup>                                                                                                  |
| LSK              | Live/Lin <sup>-</sup> /Sca-1 <sup>+</sup> /c-Kit <sup>+</sup>                                                                              |
| HSCs             | Live/Lin <sup>-</sup> /Sca-1 <sup>+</sup> /c-Kit <sup>+</sup> /CD34 <sup>-</sup> /Flt3 <sup>-</sup> /CD150 <sup>+</sup> /CD48 <sup>-</sup> |
| MPP1             | Live/Lin <sup>-</sup> /Sca-1 <sup>+</sup> /c-Kit <sup>+</sup> /CD34 <sup>+</sup> /Flt3 <sup>-</sup> /CD150 <sup>+</sup> /CD48 <sup>-</sup> |
| MPP2             | Live/Lin <sup>-</sup> /Sca-1 <sup>+</sup> /c-Kit <sup>+</sup> /CD34 <sup>+</sup> /Flt3 <sup>-</sup> /CD150 <sup>+</sup> /CD48 <sup>+</sup> |
| MPP3             | Live/Lin <sup>-</sup> /Sca-1 <sup>+</sup> /c-Kit <sup>+</sup> /CD34 <sup>+</sup> /Flt3 <sup>-</sup> /CD150 <sup>-</sup> /CD48 <sup>+</sup> |
| MPP4             | Live/Lin <sup>-</sup> /Sca-1 <sup>+</sup> /c-Kit <sup>+</sup> /CD34 <sup>+</sup> /Flt3 <sup>+</sup>                                        |

**Flow cytometer setting**

| BD Influx   |           |                |              |        |
|-------------|-----------|----------------|--------------|--------|
| Laser color | Laser, nm | Band, nm/range | Fluorochrome | Marker |
| Blue-green  | 488       | 530/40 BP      | FITC         | CD34   |
|             |           | 710/50 BP      | PerCP-Cy5.5  | Sca-1  |
| Violet      | 405       | 460/50 BP      | BV421        | Flt3   |
|             |           | 520/35 BP      | BV510        | CD41   |

|     |     |           |               |           |
|-----|-----|-----------|---------------|-----------|
| Red | 642 | 610/20 BP | PE-Dazzle 594 | CD150     |
|     |     | 750 LP    | PE-Cy7        | c-Kit     |
|     |     | 670/30 BP | APC           | CD48      |
|     |     | 720/40 BP | GD Red 710    | Viability |
|     |     | 750 LP    | APC-Cy7       | Lin       |

**BD LSR Fortessa (apoptosis and senescence or autophagy)**

| Laser color | Laser, nm | Band, nm/range | Fluorochrome  | Marker                        |
|-------------|-----------|----------------|---------------|-------------------------------|
| Violet      | 405       | 450/50 BP      | BV421         | CD34                          |
|             |           | 520/50 BP      | BV510         | CD41                          |
| Blue-green  | 488       | 530/30 BP      | FITC          | Ki67                          |
|             |           | 710/50 BP      | PerCP-Cy5.5   | Sca-1                         |
| Yellow      | 561       | 582/15 BP      | PE            | Flt3                          |
|             |           | 610/20 BP      | PE-Dazzle 594 | CD150                         |
| Red         | 640       | 780/60 BP      | PE-Cy7        | c-Kit                         |
|             |           | 670/14 BP      | APC           | CD48                          |
|             |           | 730/45 BP      | GD Red 710    | Viability                     |
| Blue-green  | 488       | 780/60 BP      | APC-Cy7       | Lin                           |
|             |           | 530/30 BP      | FITC          | Annexin V, LacZ<br>or Cyto-ID |

**BD LSR Fortessa (cell cycle analysis)**

| Laser color | Laser, nm | Band, nm/range | Fluorochrome     | Marker    |
|-------------|-----------|----------------|------------------|-----------|
| Ultraviolet | 355       | 450/20 BP      | DAPI             | DNA       |
|             |           | 605/12 BP      | Super Bright 600 | CD48      |
| Blue-green  | 488       | 530/30 BP      | FITC             | Ki67      |
|             |           | 710/50 BP      | PerCP-Cy5.5      | Sca-1     |
| Yellow      | 561       | 582/15 BP      | PE               | Flt3      |
|             |           | 610/20 BP      | PE-Dazzle 594    | CD150     |
| Red         | 640       | 780/60 BP      | PE-Cy7           | c-Kit     |
|             |           | 670/14 BP      | eFluor 660       | CD34      |
|             |           | 730/45 BP      | GD Red 710       | Viability |
|             |           | 780/60 BP      | APC-Cy7          | Lin       |

**Amnis ImageStreamX Mark II (cytosolic dsDNA)**

| Laser color | Laser, nm | Band, nm/range | Fluorochrome  | Marker      |
|-------------|-----------|----------------|---------------|-------------|
| Blue-green  | 488       | 530/30 BP      | FITC          | CD34        |
|             |           | 710/50 BP      | PerCP-Cy5.5   | Sca-1       |
| Yellow      | 561       | 582/15 BP      | PE            | Flt3        |
|             |           | 610/20 BP      | PE-Dazzle 594 | CD150       |
| Violet      | 405       | 780/60 BP      | PE-Cy7        | CD48        |
|             |           | 610/30 BP      | BV605         | c-Kit       |
| Red         | 633       | 470/70 BP      | Hoechst 33342 | nuclear DNA |
|             |           | 780/60 BP      | APC-Cy7       | Lin         |
|             |           | 702/86 BP      | Alexa-647     | dsDNA       |

**Supplementary Table 4. Cell surface marker panel used in the analysis of mouse peripheral blood chimerism.**

| <b>Population</b>             |                  | <b>Gating strategy</b>                                                              |                     |               |
|-------------------------------|------------------|-------------------------------------------------------------------------------------|---------------------|---------------|
| Live cells                    |                  | Single cells/DAPI negative                                                          |                     |               |
| Recipient cells               |                  | Live/CD45.1 <sup>+</sup> /CD45.2 <sup>-</sup>                                       |                     |               |
| Donor cells                   |                  | Live/CD45.1 <sup>-</sup> /CD45.2 <sup>+</sup>                                       |                     |               |
| T cells                       |                  | Live/CD45.1 <sup>-</sup> /CD45.2 <sup>+</sup> /CD3ε <sup>+</sup>                    |                     |               |
| Myeloid cells                 |                  | Live/CD45.1 <sup>-</sup> /CD45.2 <sup>+</sup> /CD11b <sup>+</sup> /Gr1 <sup>+</sup> |                     |               |
| B cells                       |                  | Live/CD45.1 <sup>-</sup> /CD45.2 <sup>+</sup> /B220 <sup>+</sup>                    |                     |               |
| <b>Flow cytometer setting</b> |                  |                                                                                     |                     |               |
| <b>BD LSR Fortessa</b>        |                  |                                                                                     |                     |               |
| <b>Laser color</b>            | <b>Laser, nm</b> | <b>Band, nm/range</b>                                                               | <b>Fluorochrome</b> | <b>Marker</b> |
| UV                            | 355              | 450/20 BP                                                                           | DAPI                | Viability     |
| Blue-green                    | 488              | 530/30 BP                                                                           | FITC                | CD45.1        |
|                               |                  | 710/50 BP                                                                           | PerCP-Cy5.5         | CD11b/Gr1     |
| Yellow                        | 561              | 582/15 BP                                                                           | PE                  | CD45.2        |
| Red                           | 640              | 670/14 BP                                                                           | APC                 | CD3ε          |
|                               |                  | 780/60 BP                                                                           | APC-Cy7             | B220          |

**Supplementary Table 5. Immunophenotypic HSPC definition used in the identification, quantification and purification of human HSPCs by flow cytometry.**

| <b>Population</b>                          |                  | <b>Gating strategy</b>                                                                                                                                                                                                                       |                     |               |
|--------------------------------------------|------------------|----------------------------------------------------------------------------------------------------------------------------------------------------------------------------------------------------------------------------------------------|---------------------|---------------|
| Live cells                                 |                  | Single cells/Sytox Green Nucleic Acid Stain negative                                                                                                                                                                                         |                     |               |
| Lineage negative cells (Lin <sup>-</sup> ) |                  | CD2 <sup>-</sup> , CD3 <sup>-</sup> , CD4 <sup>-</sup> , CD7 <sup>-</sup> , CD10 <sup>-</sup> , CD11b <sup>-</sup> , CD14 <sup>-</sup> , CD19 <sup>-</sup> , CD20 <sup>-</sup> , CD33 <sup>-</sup> , CD56 <sup>-</sup> , CD235a <sup>-</sup> |                     |               |
| HSPC compartment                           |                  | Live/Lin <sup>-</sup> /CD34 <sup>+</sup>                                                                                                                                                                                                     |                     |               |
| <b>Flow cytometer setting</b>              |                  |                                                                                                                                                                                                                                              |                     |               |
| <b>BD Influx</b>                           |                  |                                                                                                                                                                                                                                              |                     |               |
| <b>Laser color</b>                         | <b>Laser, nm</b> | <b>Band, nm/range</b>                                                                                                                                                                                                                        | <b>Fluorochrome</b> | <b>Marker</b> |
| Blue-green                                 | 488              | 530/40 BP                                                                                                                                                                                                                                    | FITC                | Viability/Lin |
| Violet                                     | 405              | 460/50 BP                                                                                                                                                                                                                                    | BV421               | CD34          |
